# Supplementary material for: H3 Histone Tail Conformation within the Nucleosome and the Impact of K14 Acetylation Studied Using Enhanced Sampling Simulation
Source: PLoS Comput Biol. 2016 Mar 11;12(3):e1004788. doi: 10.1371/journal.pcbi.1004788 (PMC4788430; doi:10.1371/journal.pcbi.1004788)

**2 ARG+**

**unacetylated**

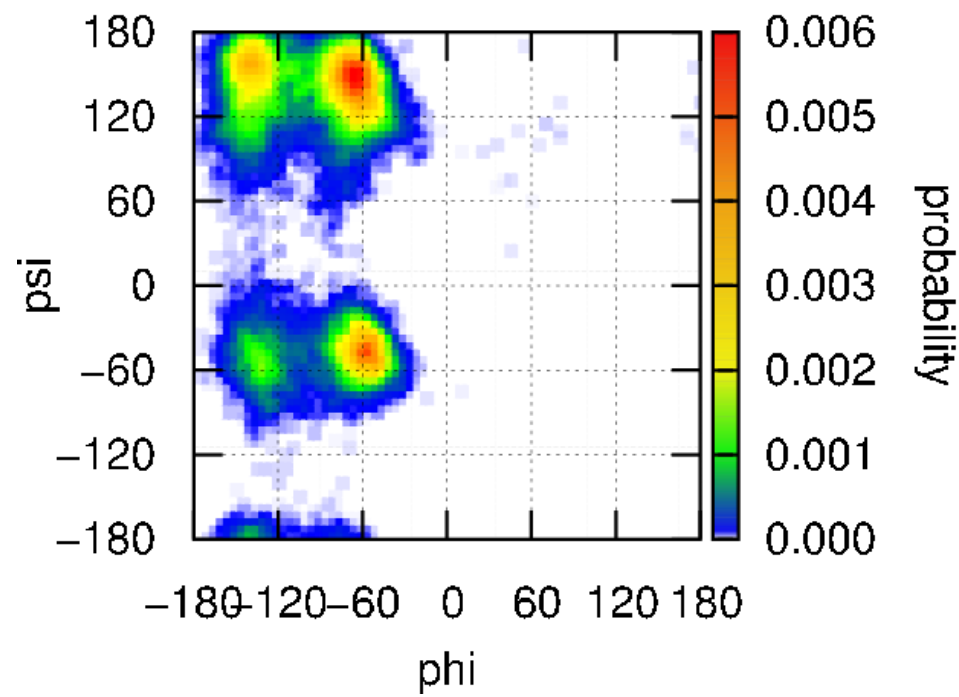

**K14ac**

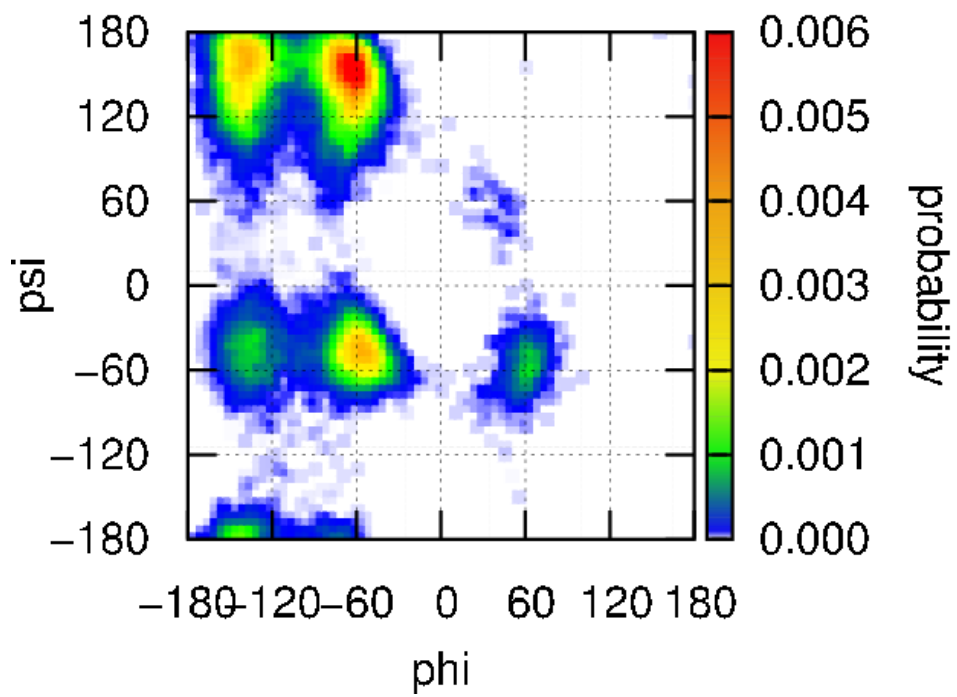

**3 THR**

**unacetylated**

**K14ac**

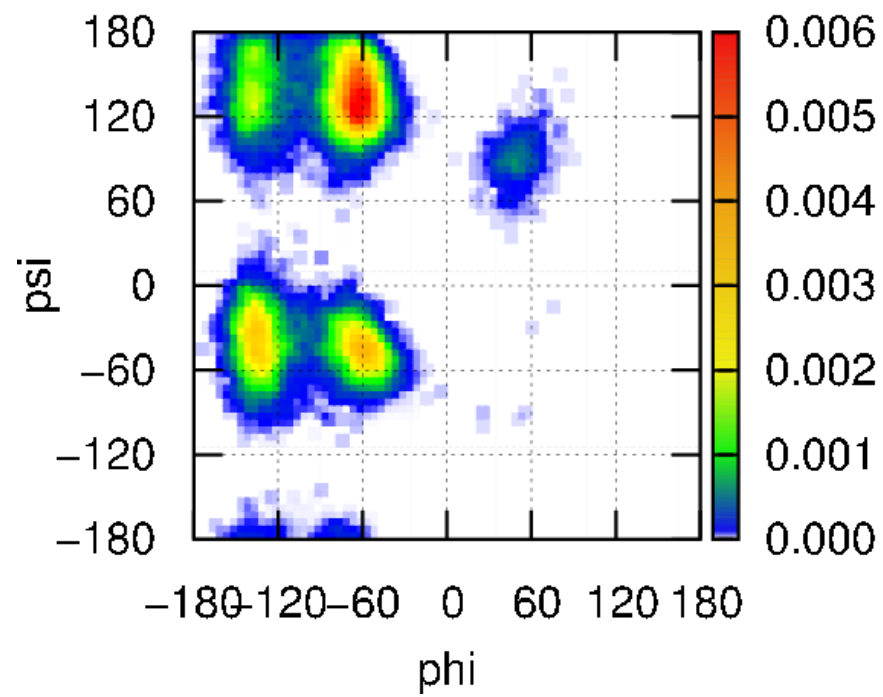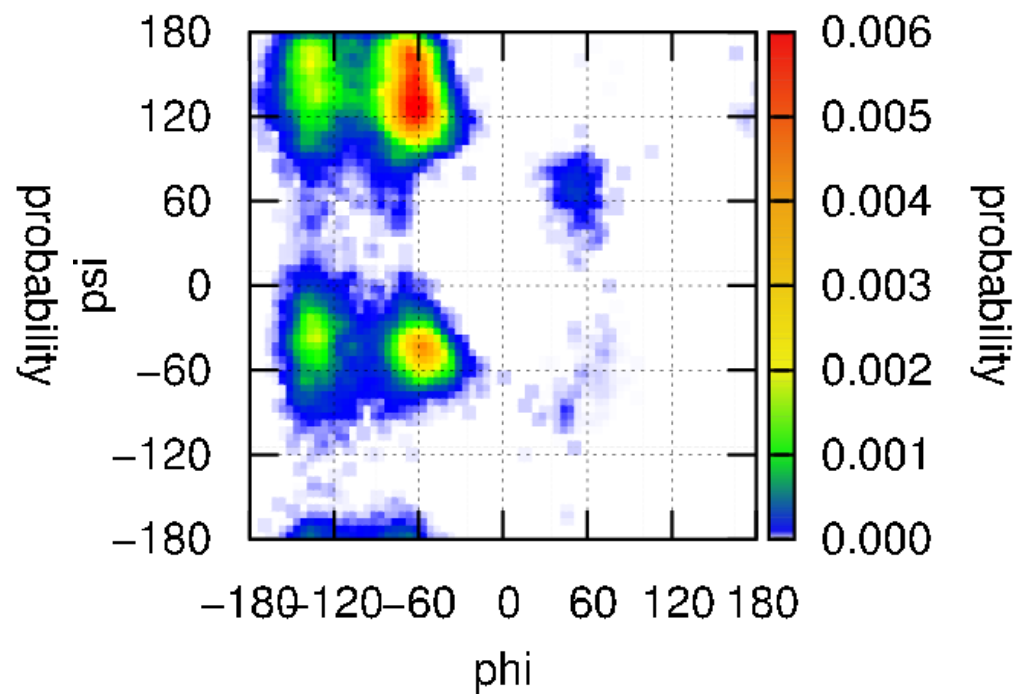

4 LYS+

unacetylated

K14ac

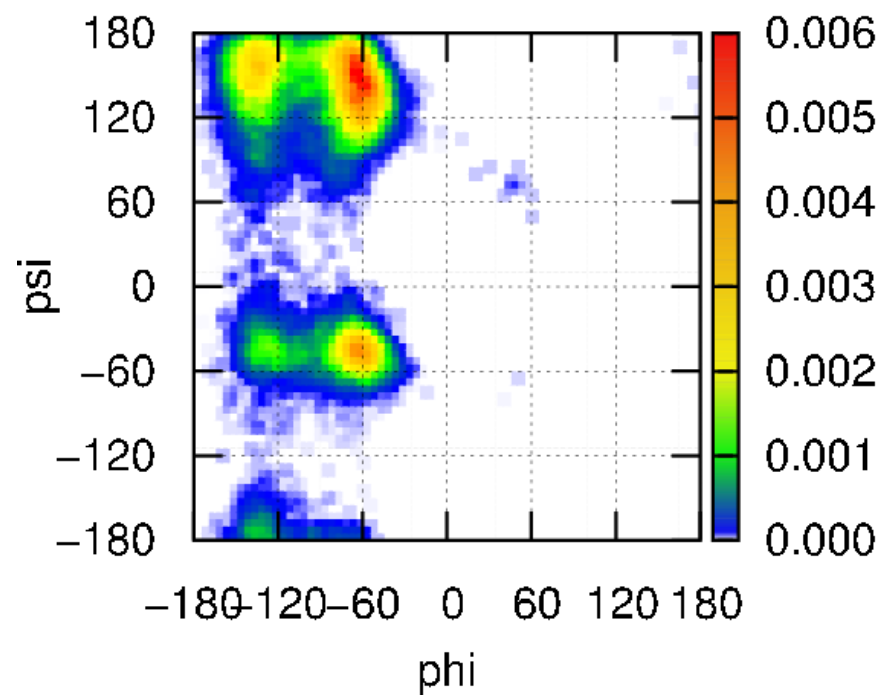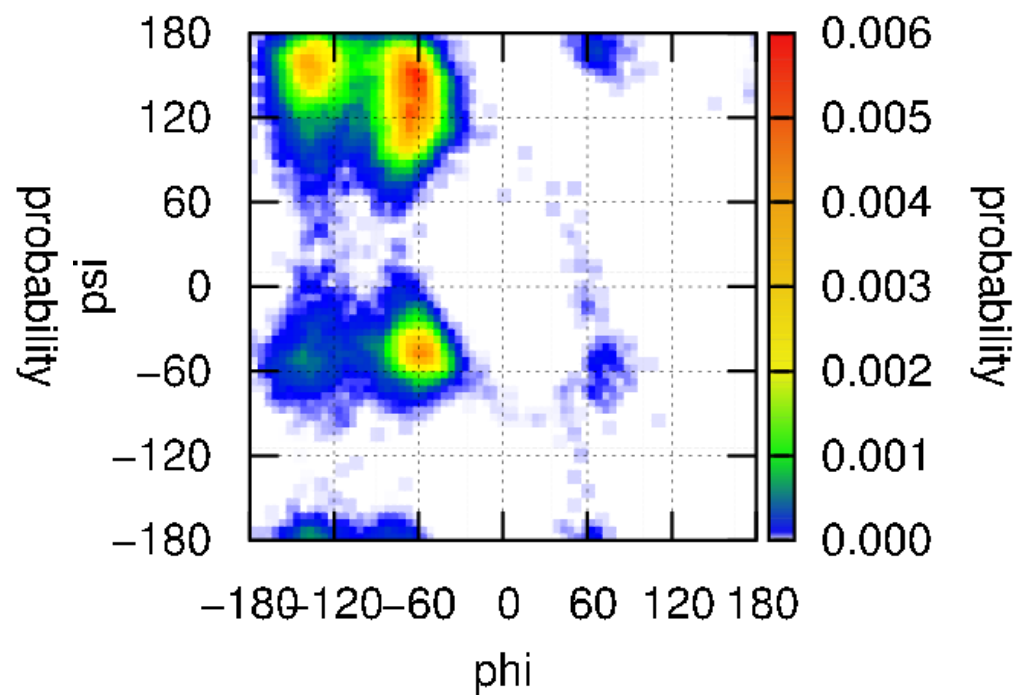

## 5 GLN

unacetylated

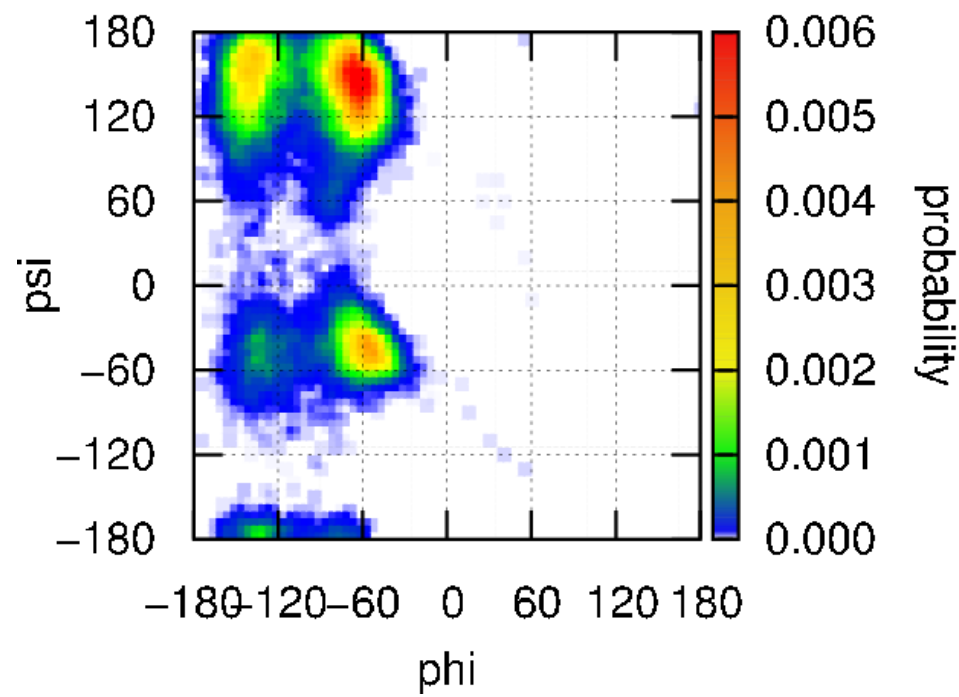

K14ac

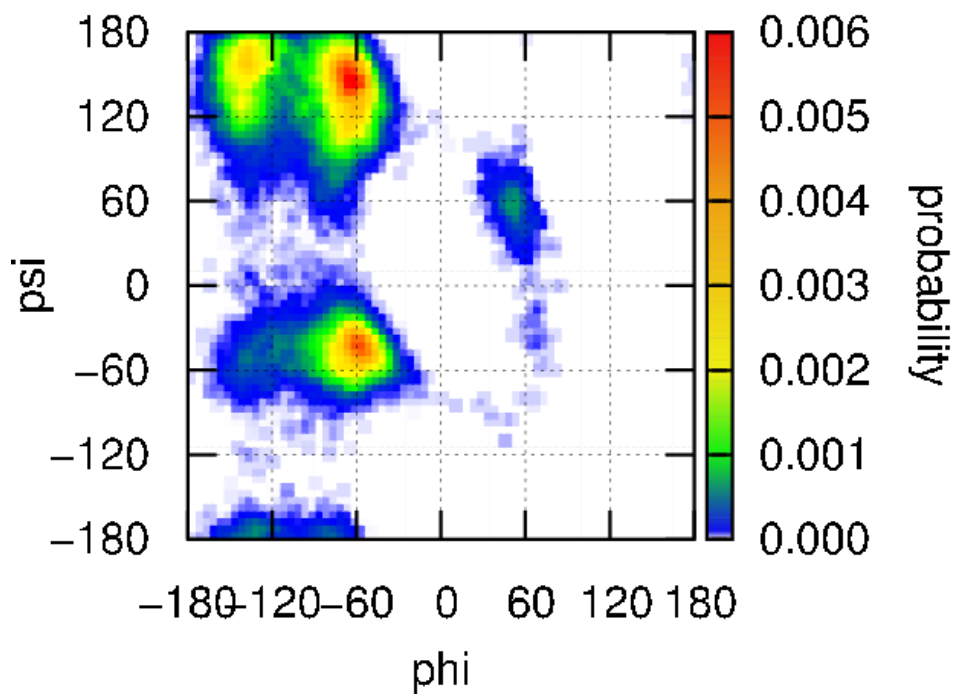

6 THR

unacetylated

K14ac

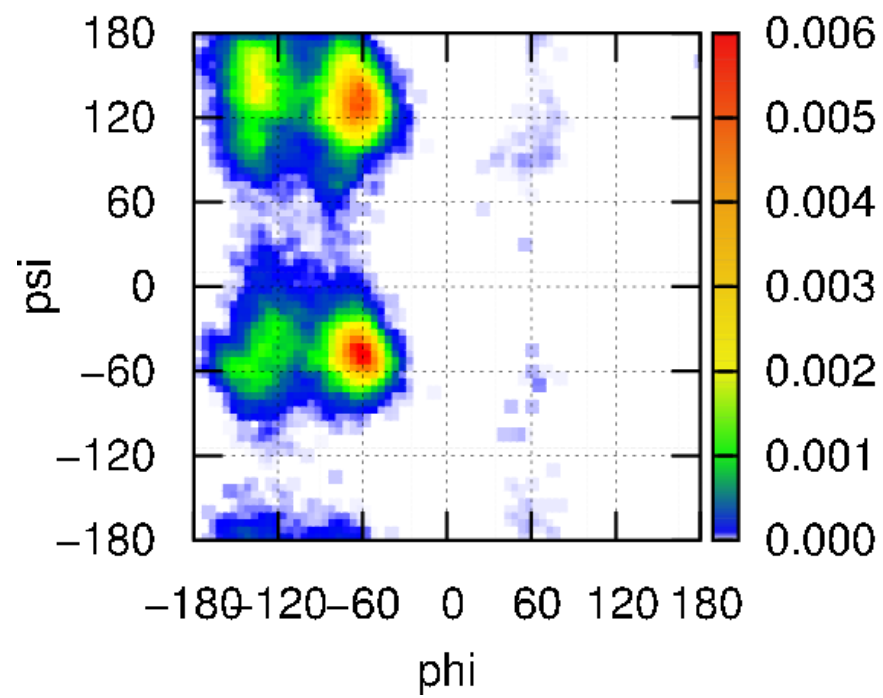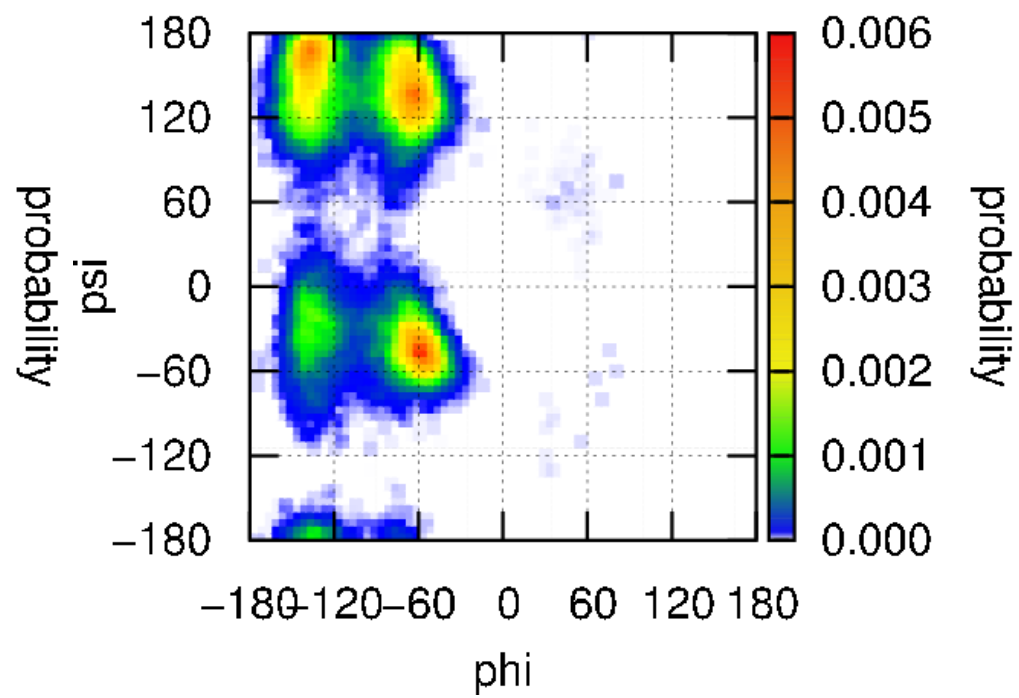

7 ALA

unacetylated

K14ac

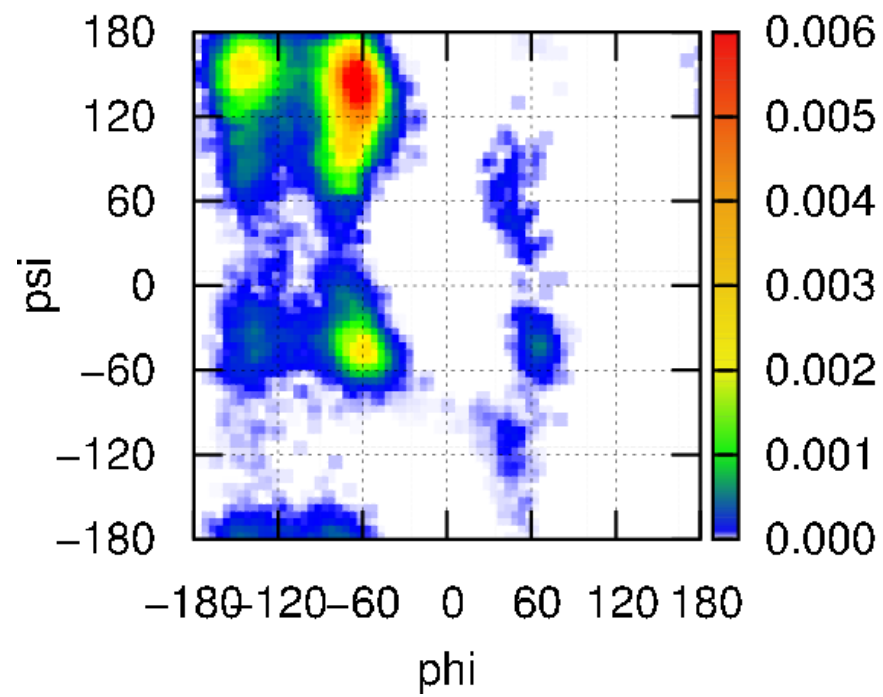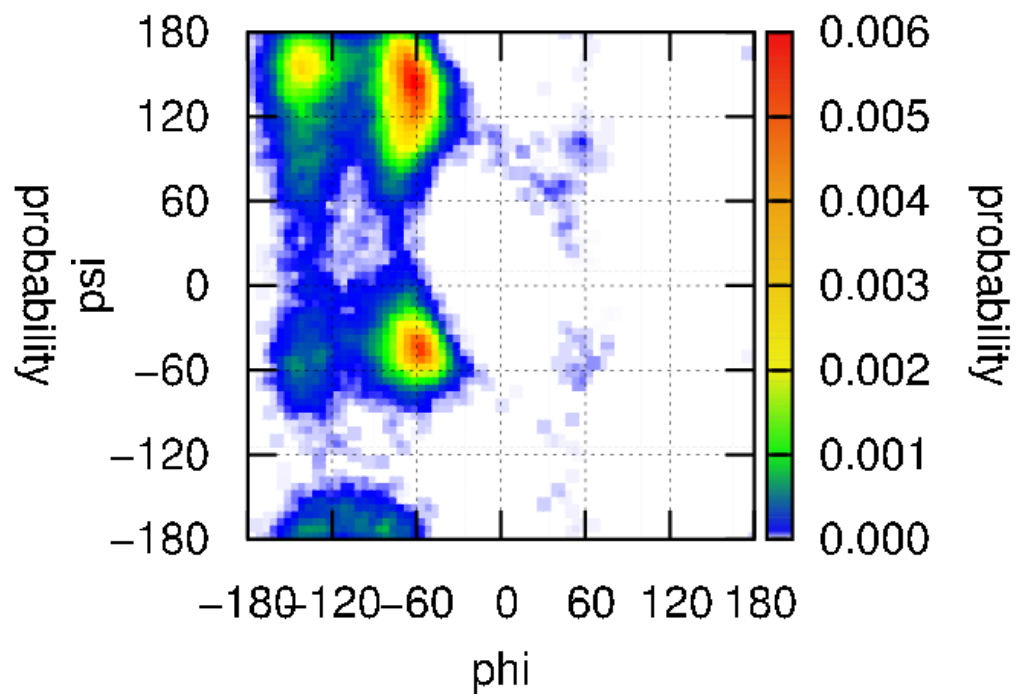

**8 ARG+**

**unacetylated**

**K14ac**

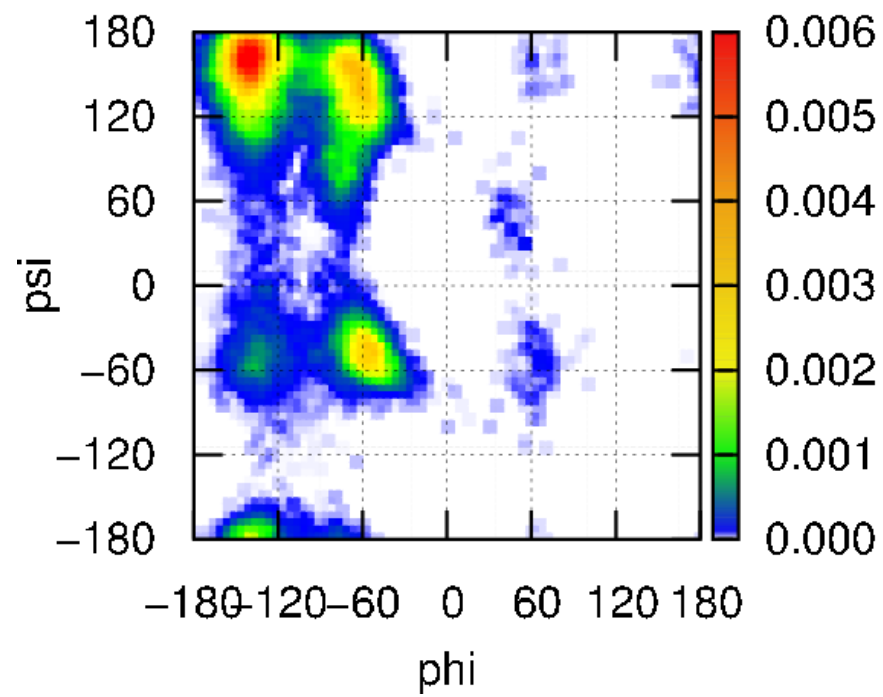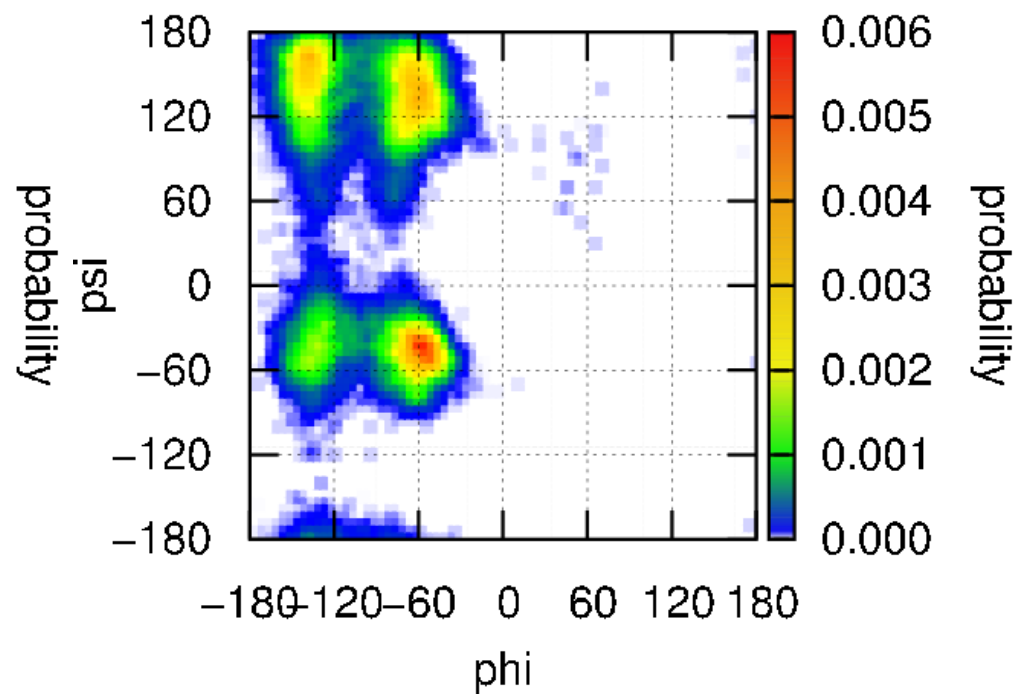

9 LYS+

unacetylated

K14ac

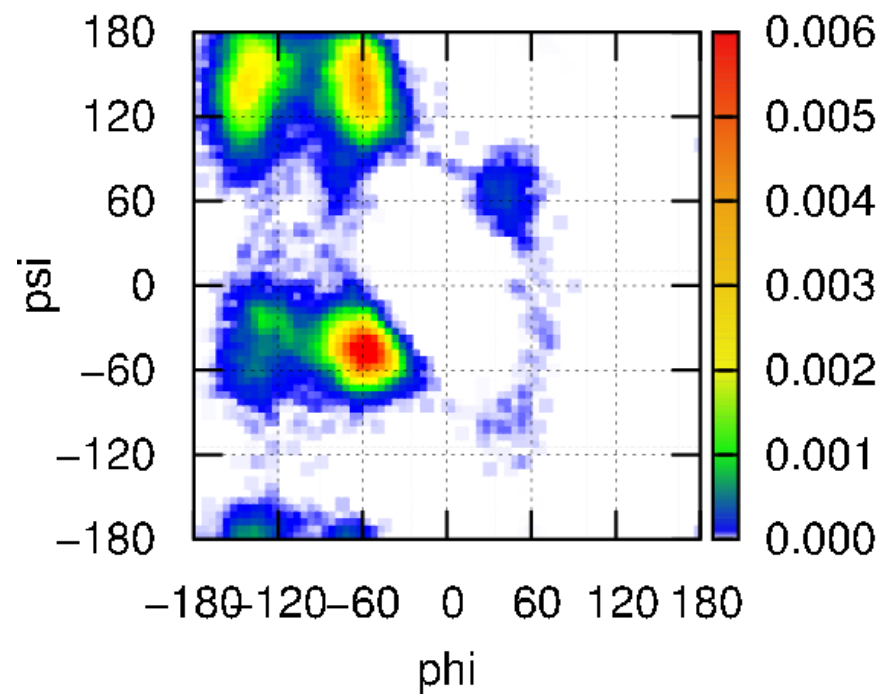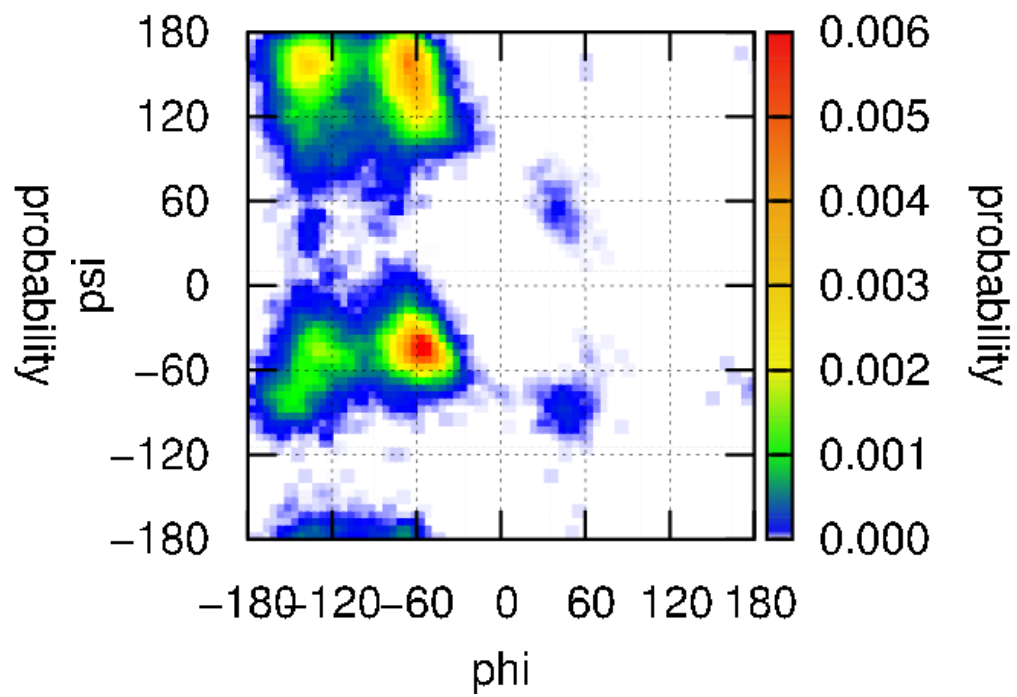

## 10 SER

unacetylated

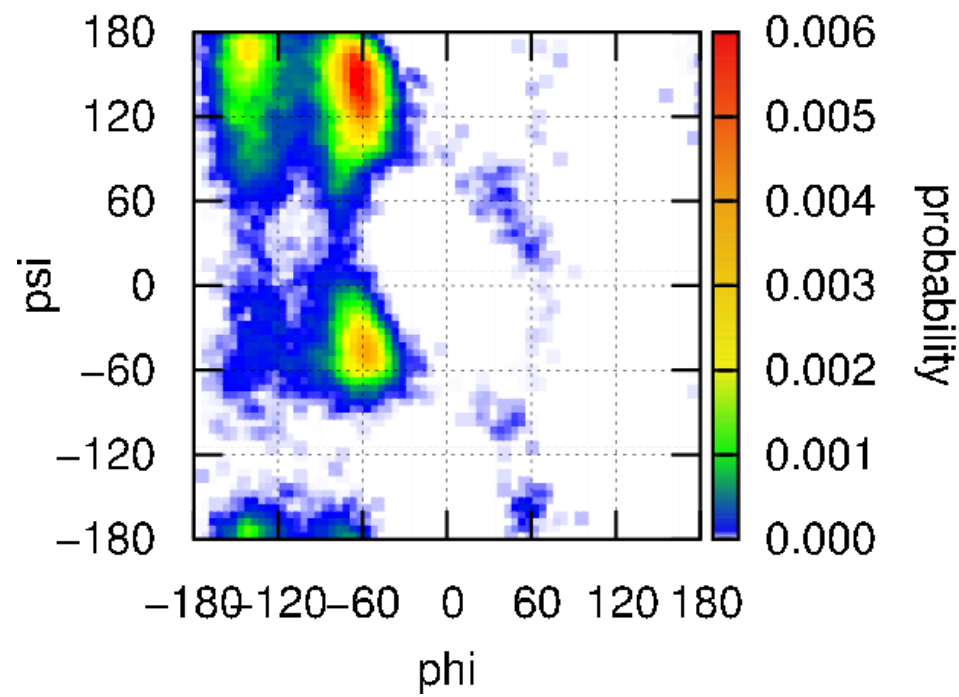

K14ac

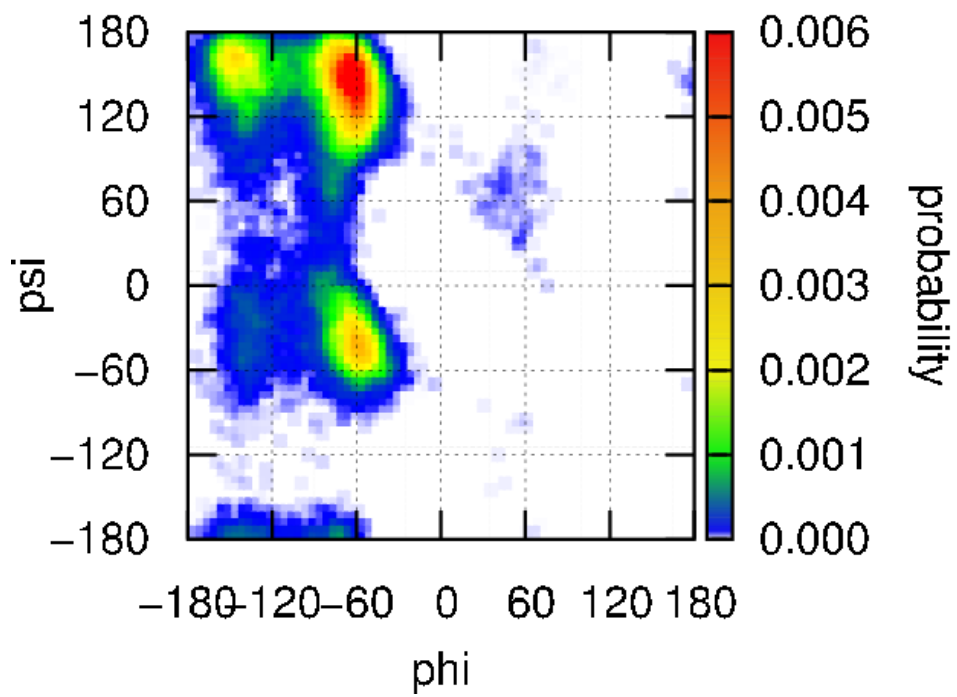

# 11 THR

unacetylated

K14ac

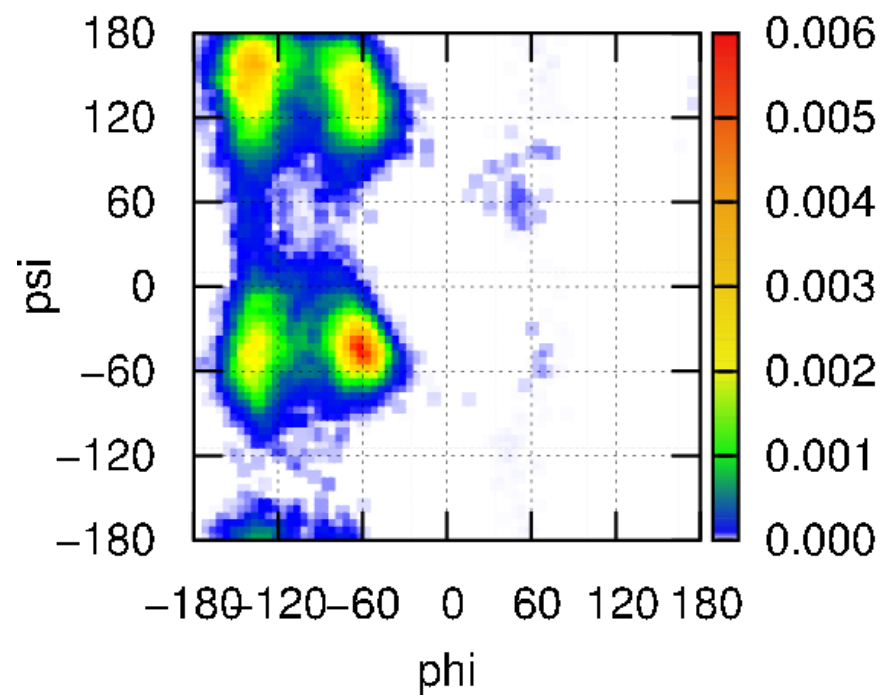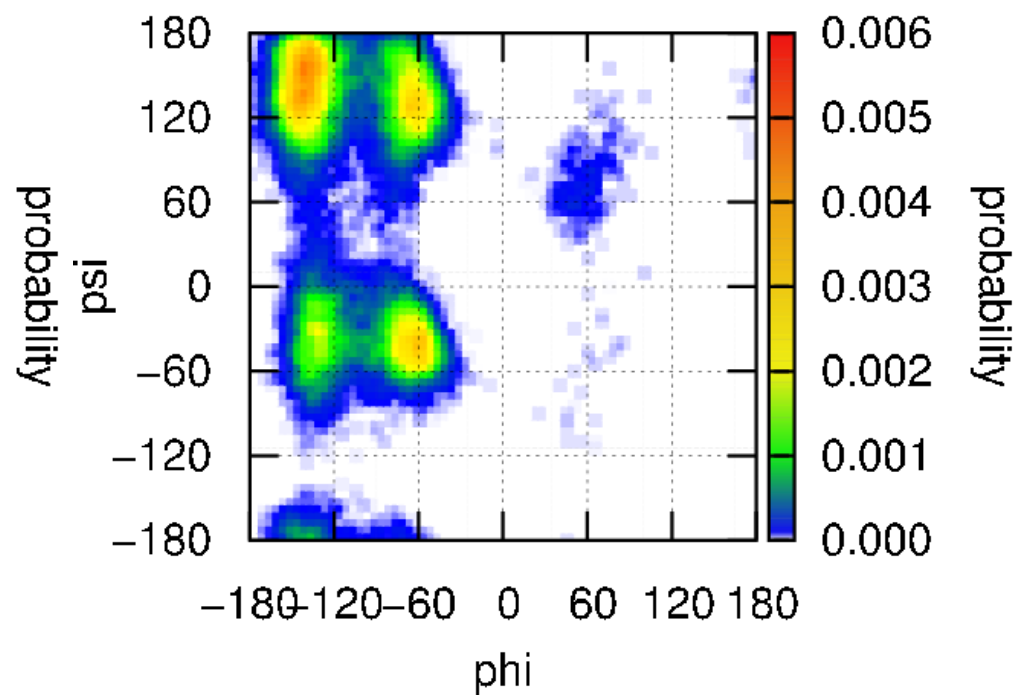

**12 GLY**

**unacetylated**

**K14ac**

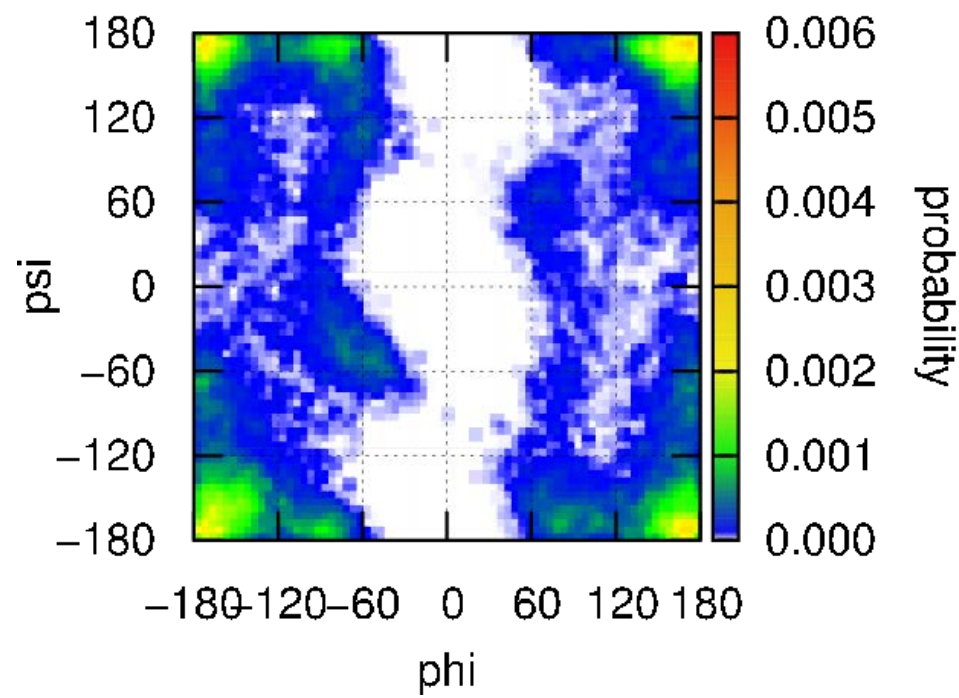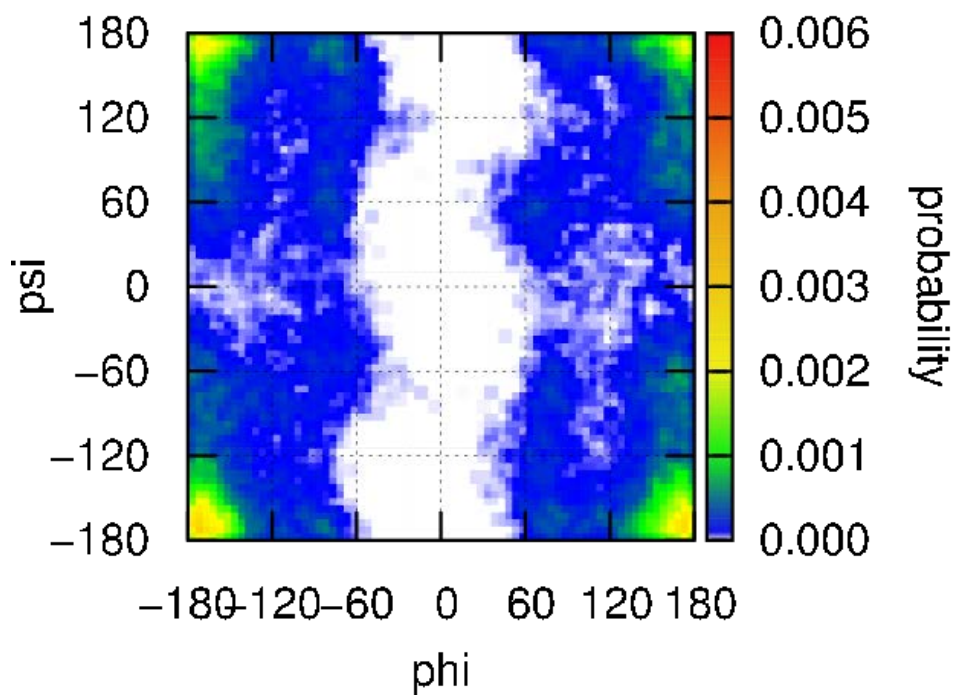

# 13 GLY

unacetylated

K14ac

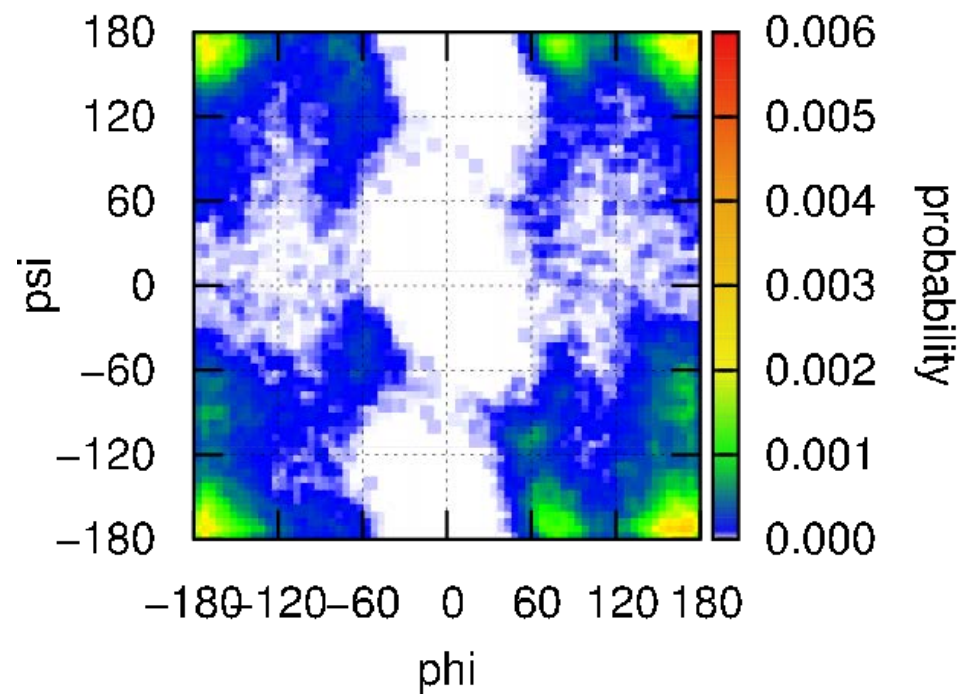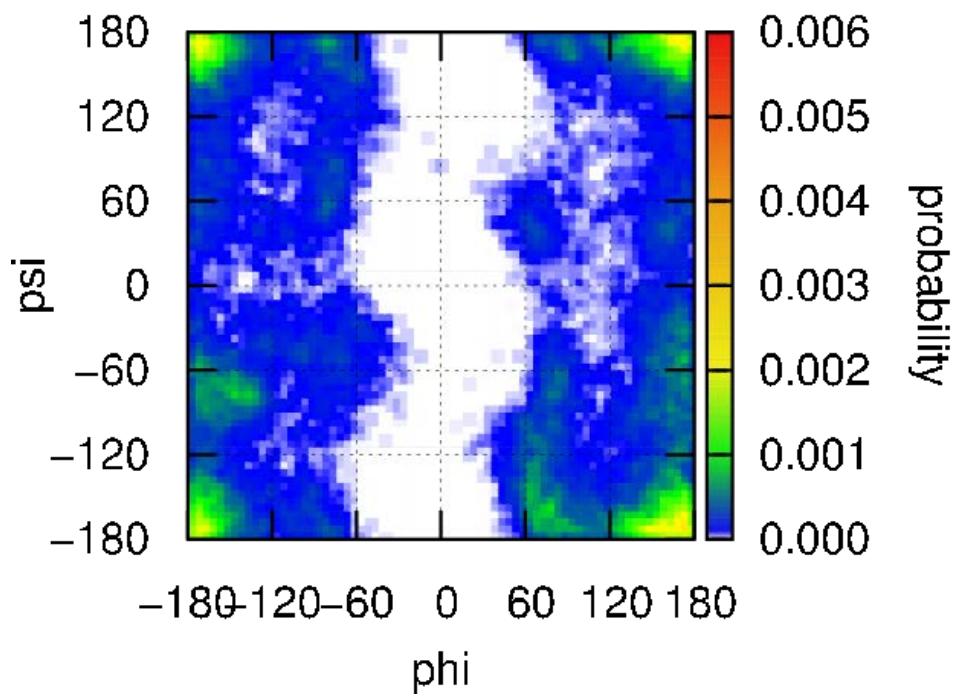

# 14 LYS+ or ACK

unacetylated

K14ac

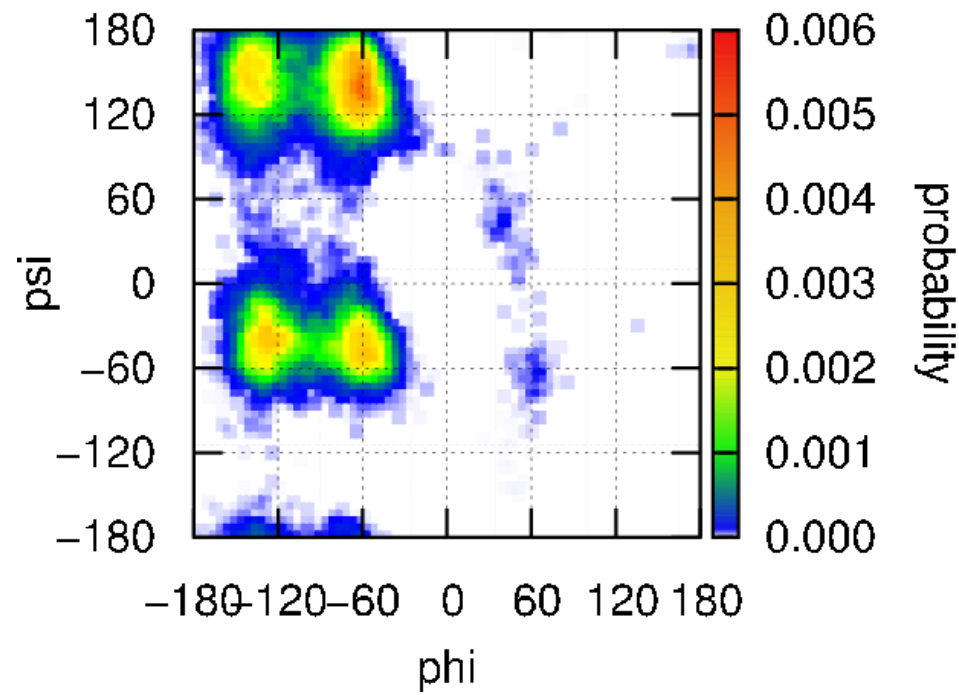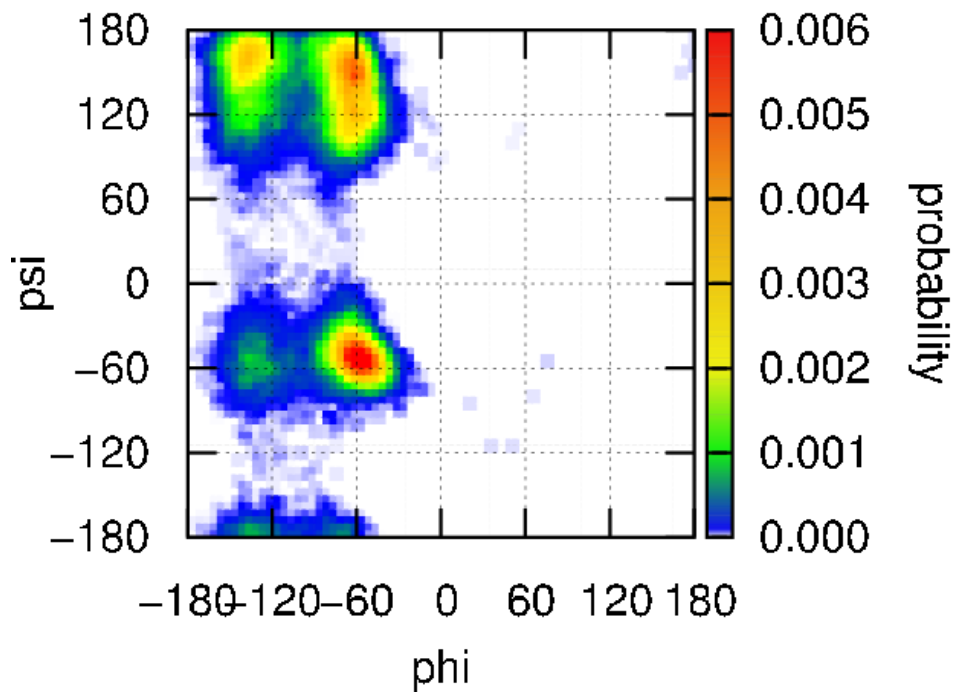

# 15 ALA

unacetylated

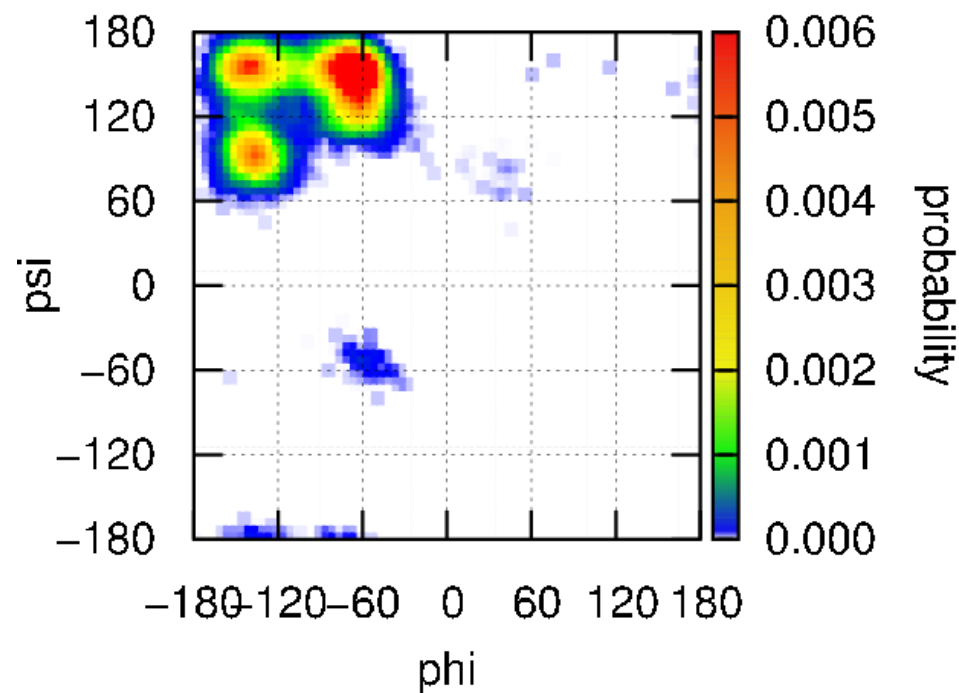

K14ac

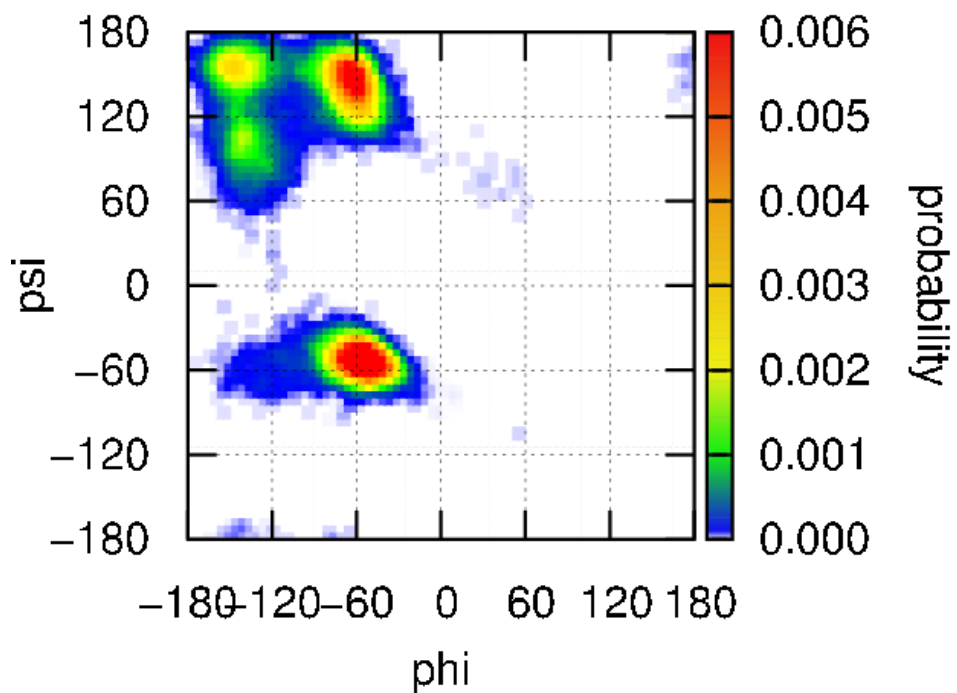

# 16 PRO

unacetylated

K14ac

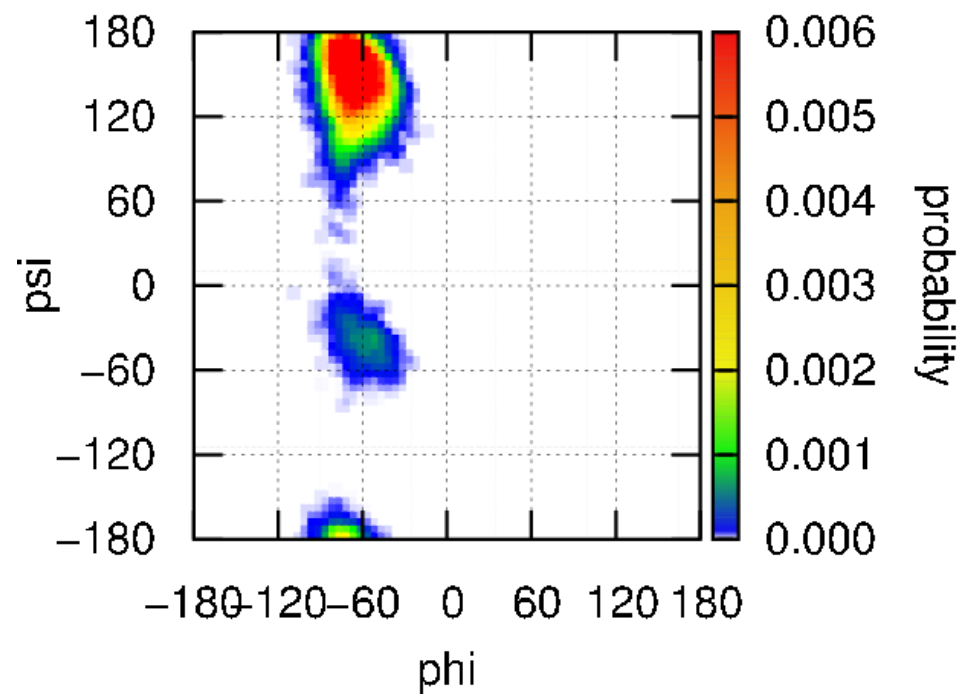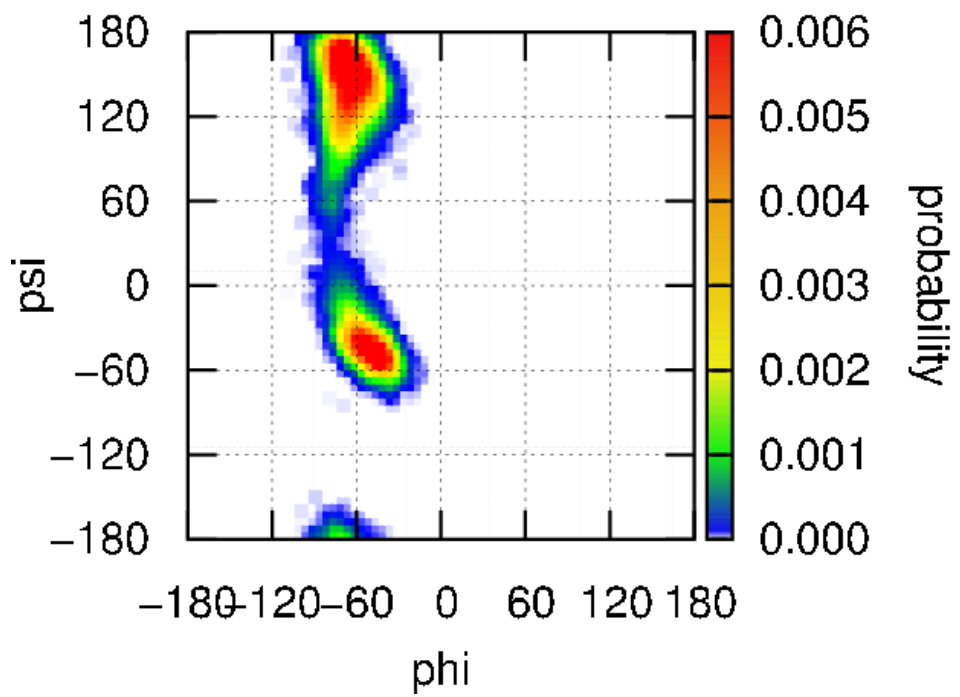

**17 ARG+**

**unacetylated**

**K14ac**

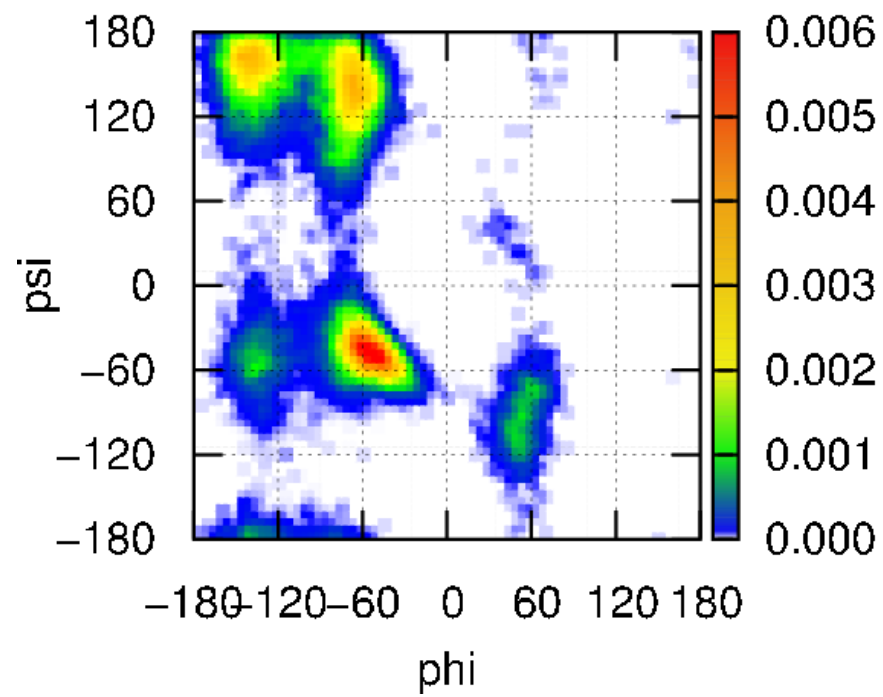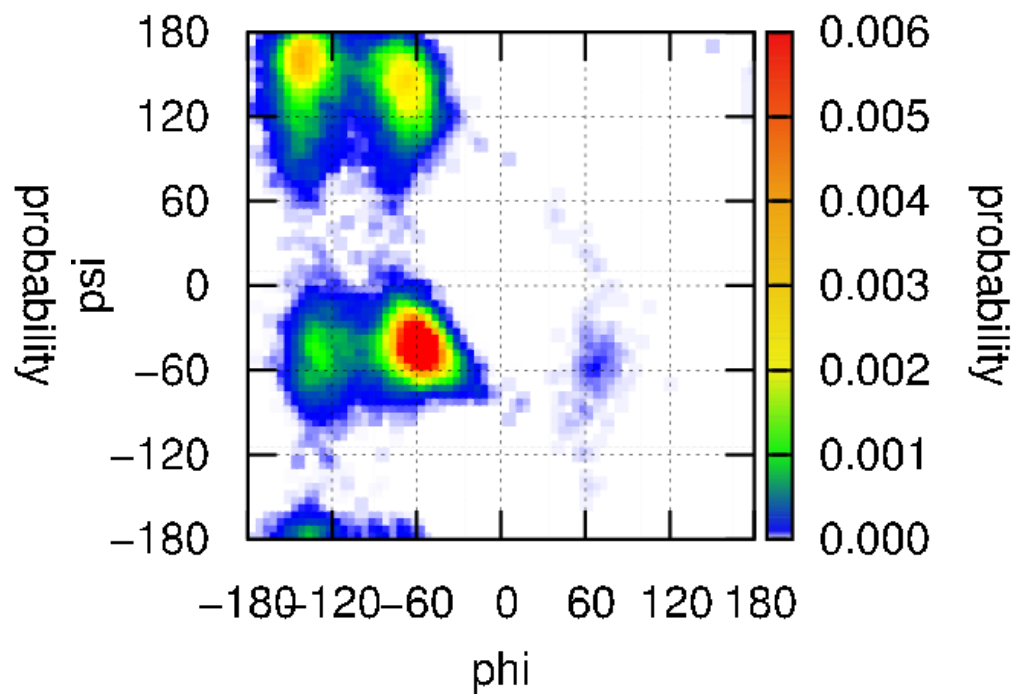

18 LYS+

unacetylated

K14ac

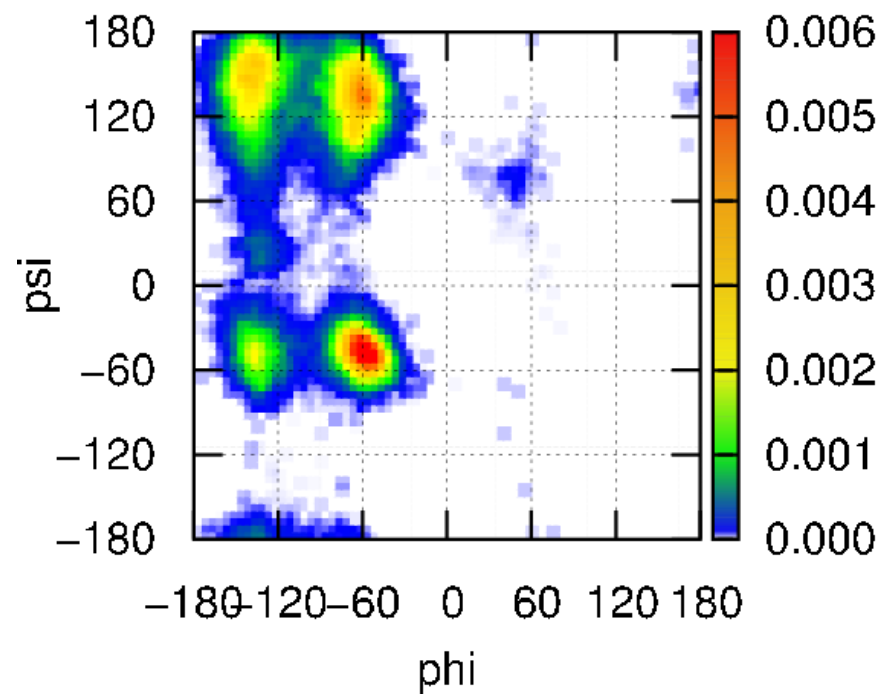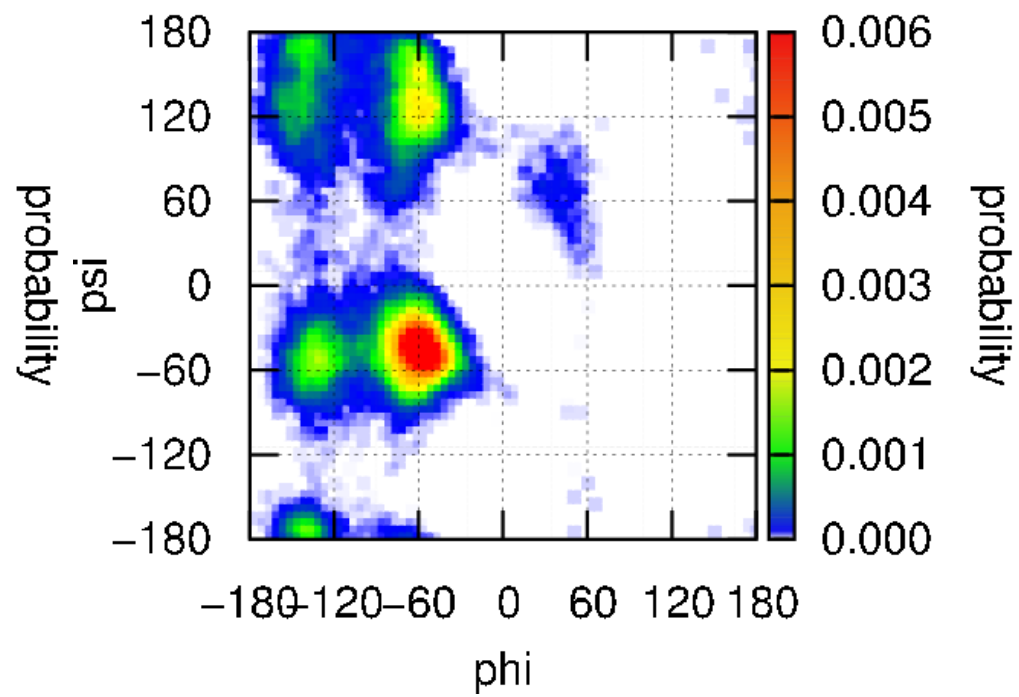

## 19 GLN

unacetylated

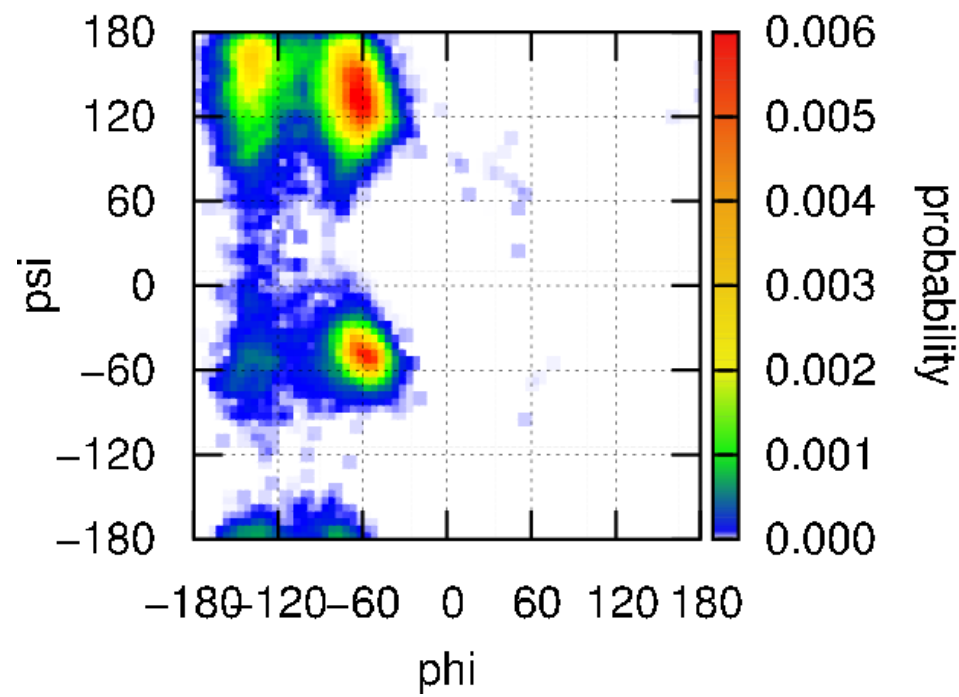

K14ac

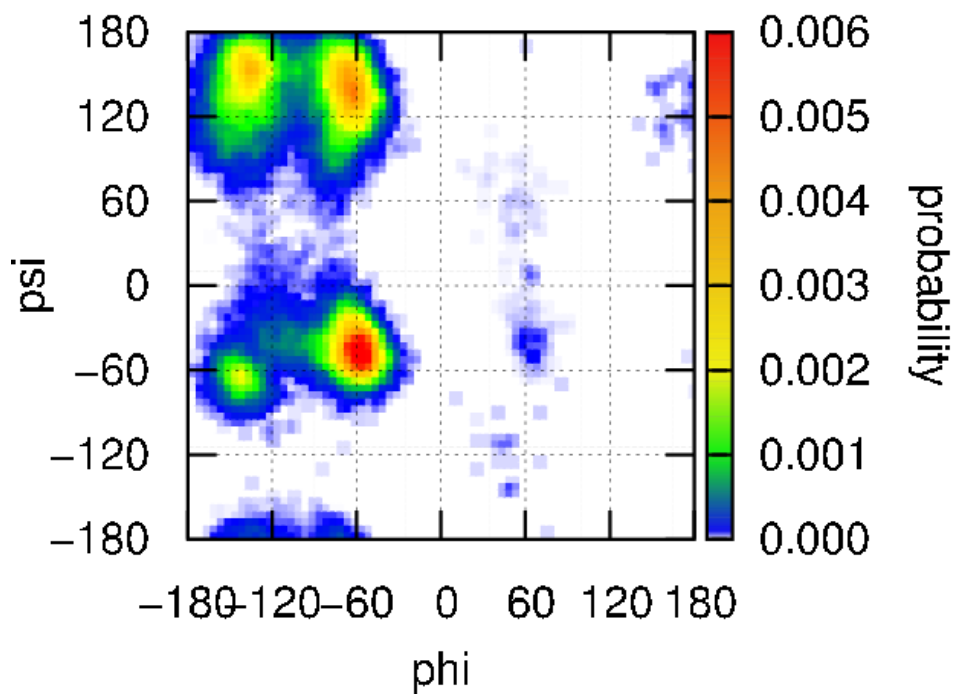

20 LEU

unacetylated

K14ac

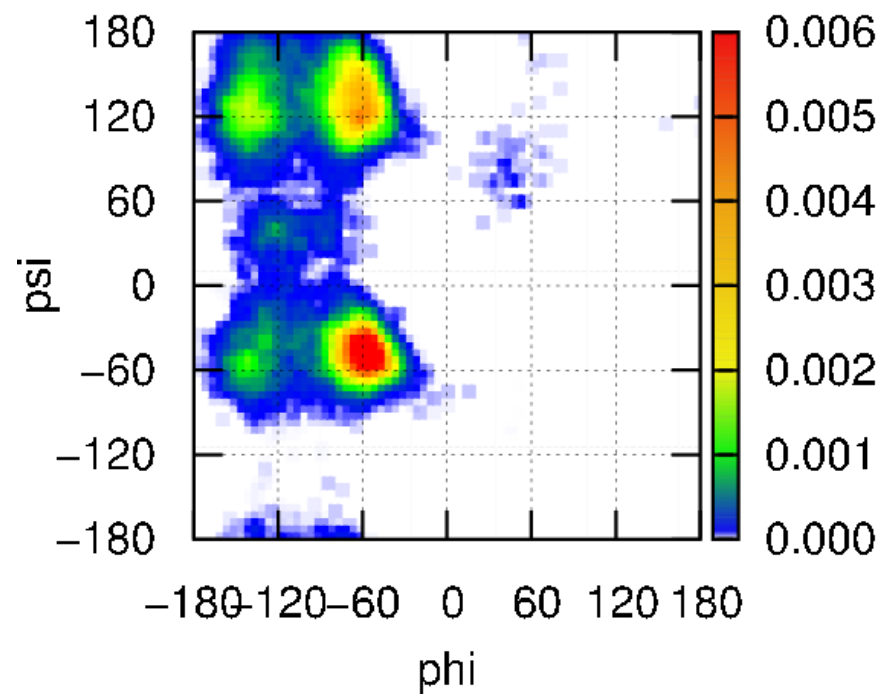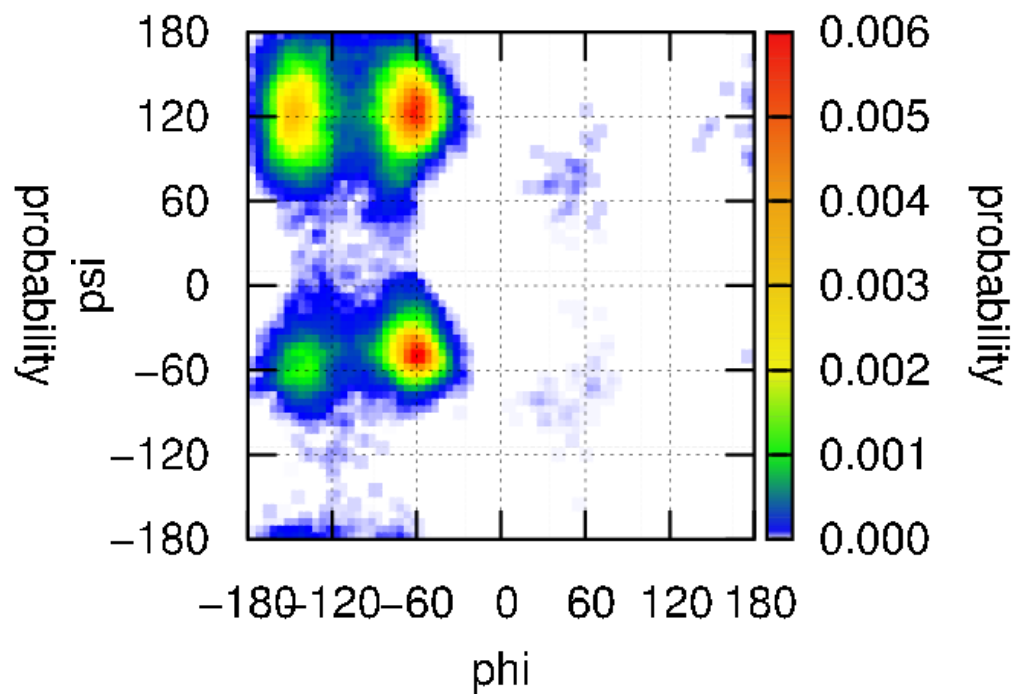

## 21 ALA

unacetylated

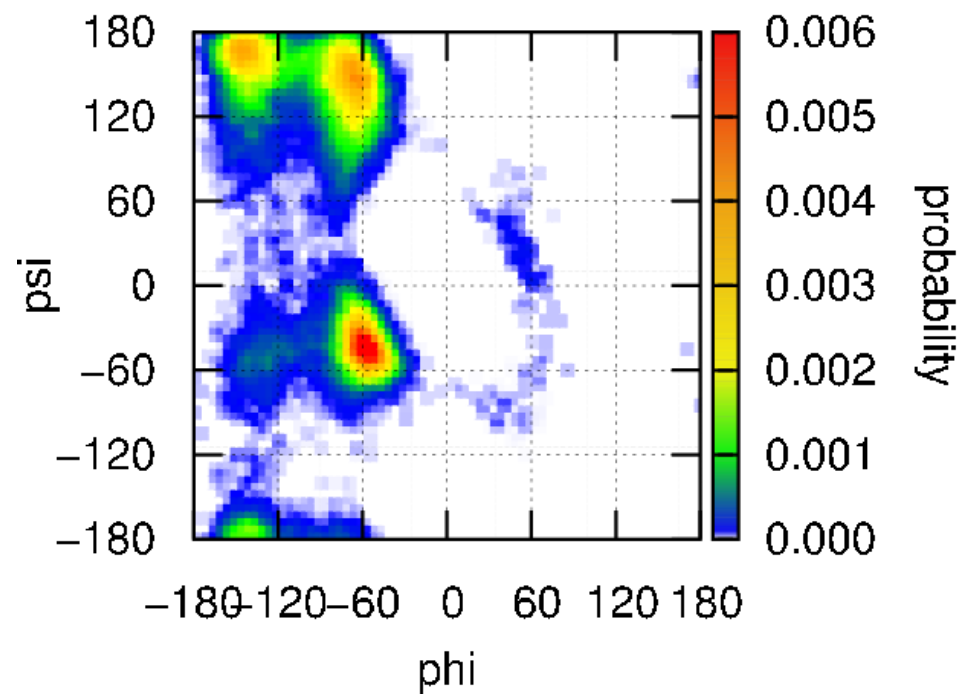

K14ac

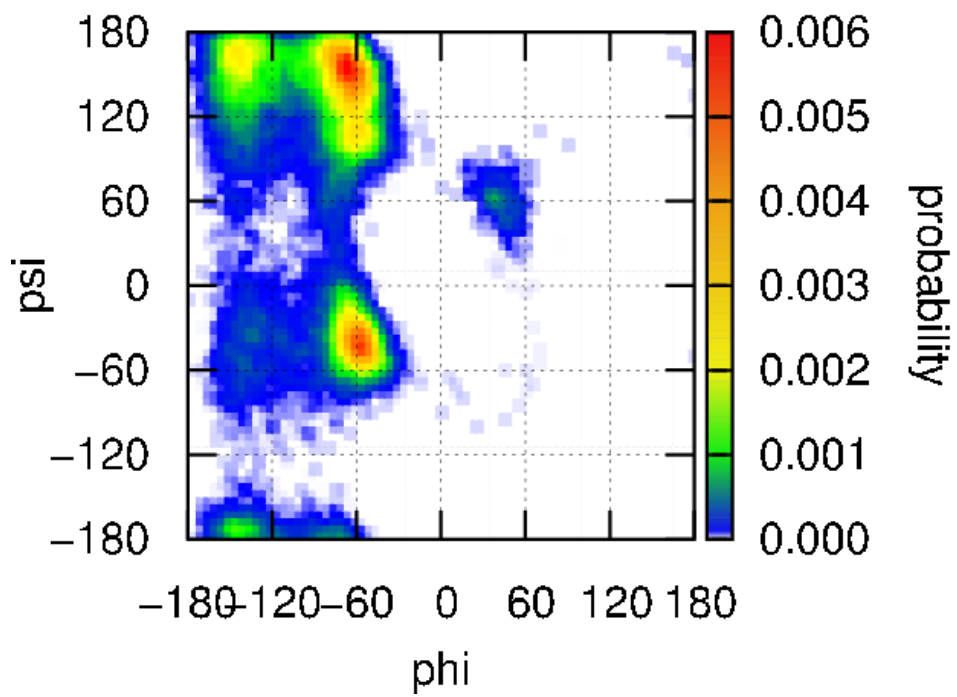

## 22 THR

unacetylated

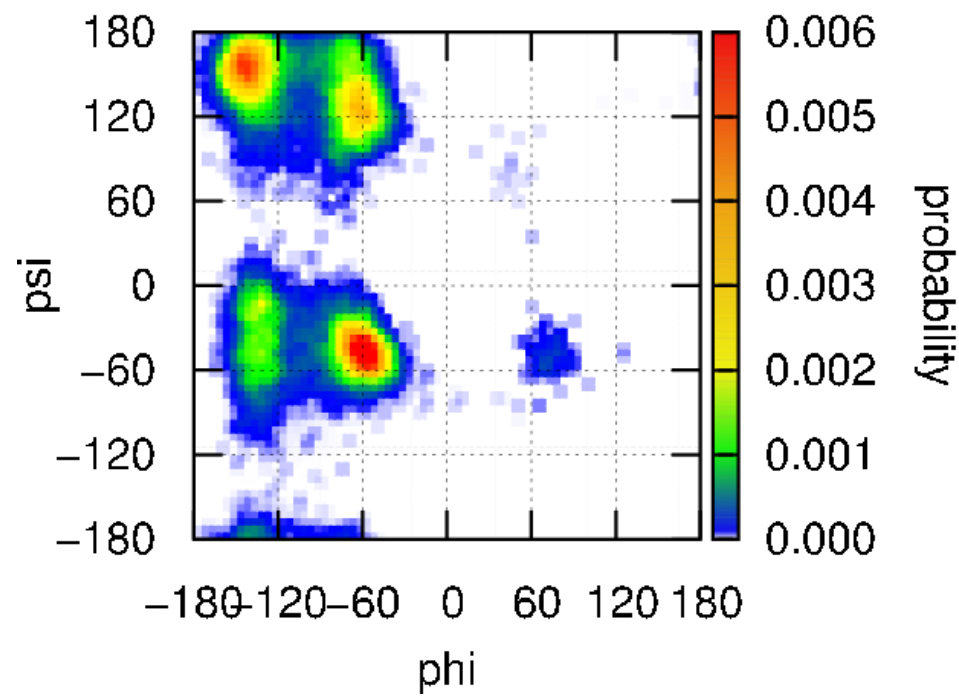

K14ac

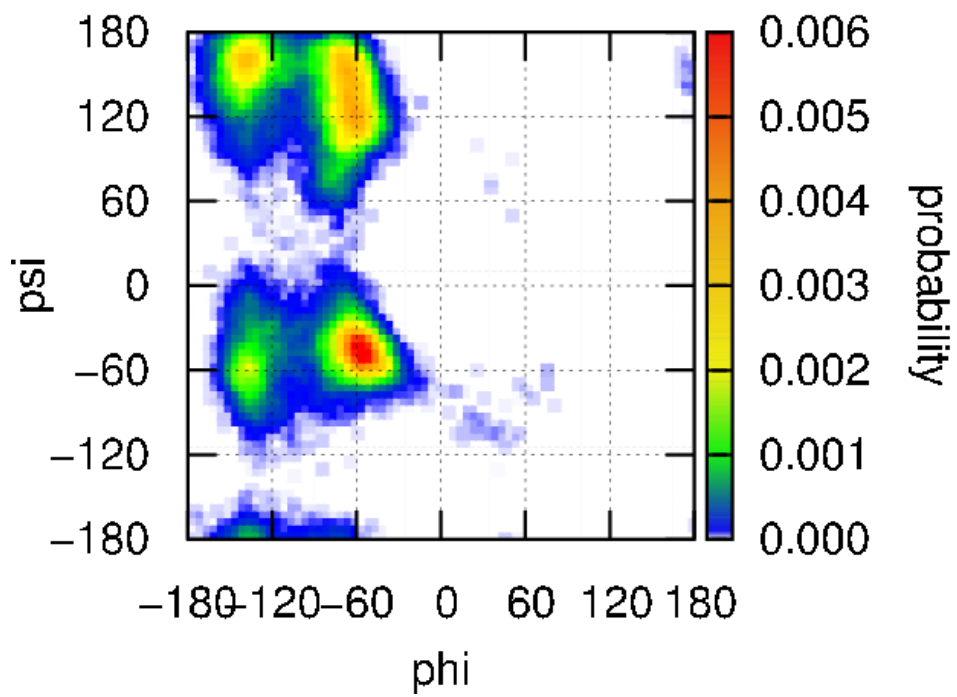

23 LYS+

unacetylated

K14ac

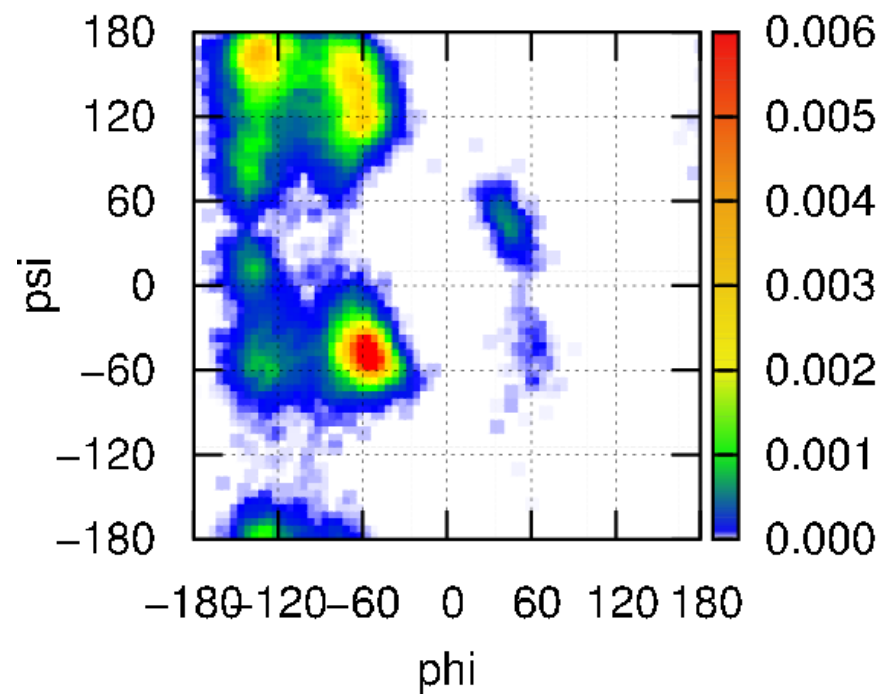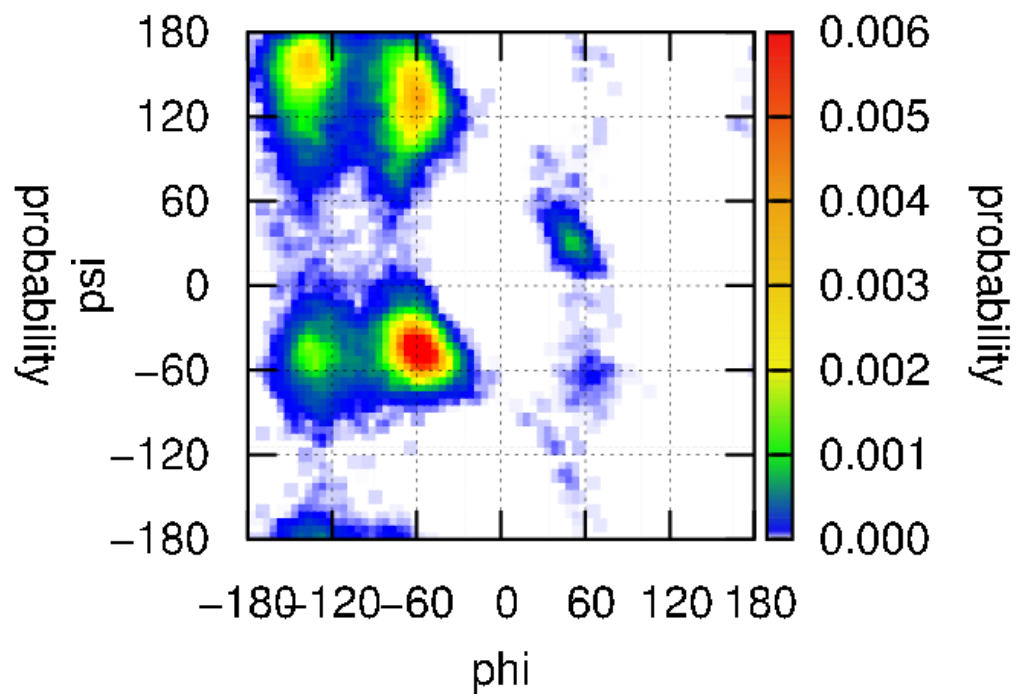

## 24 ALA

unacetylated

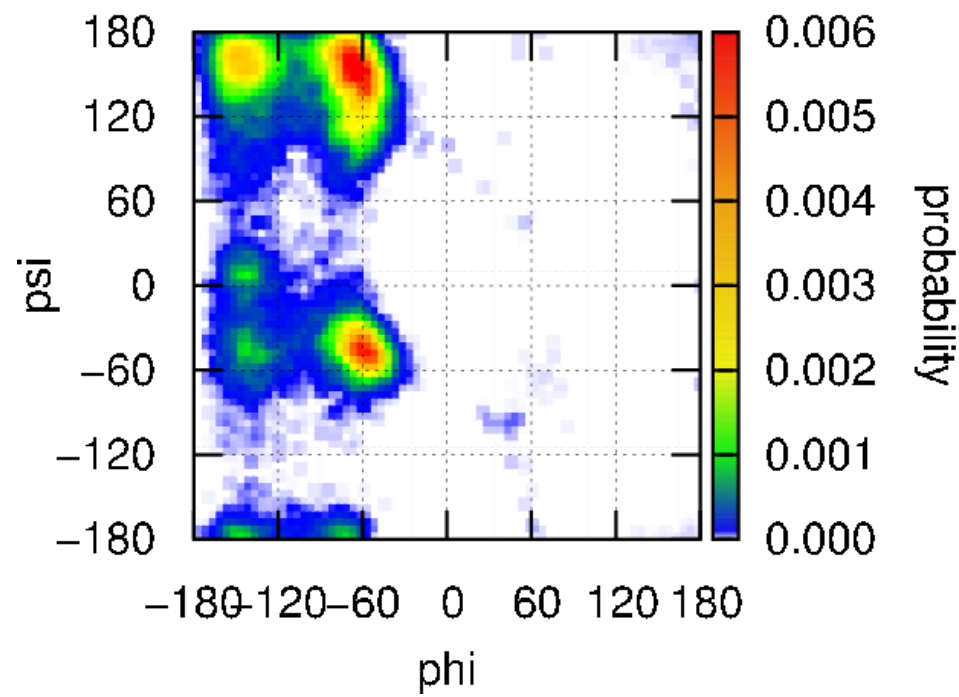

K14ac

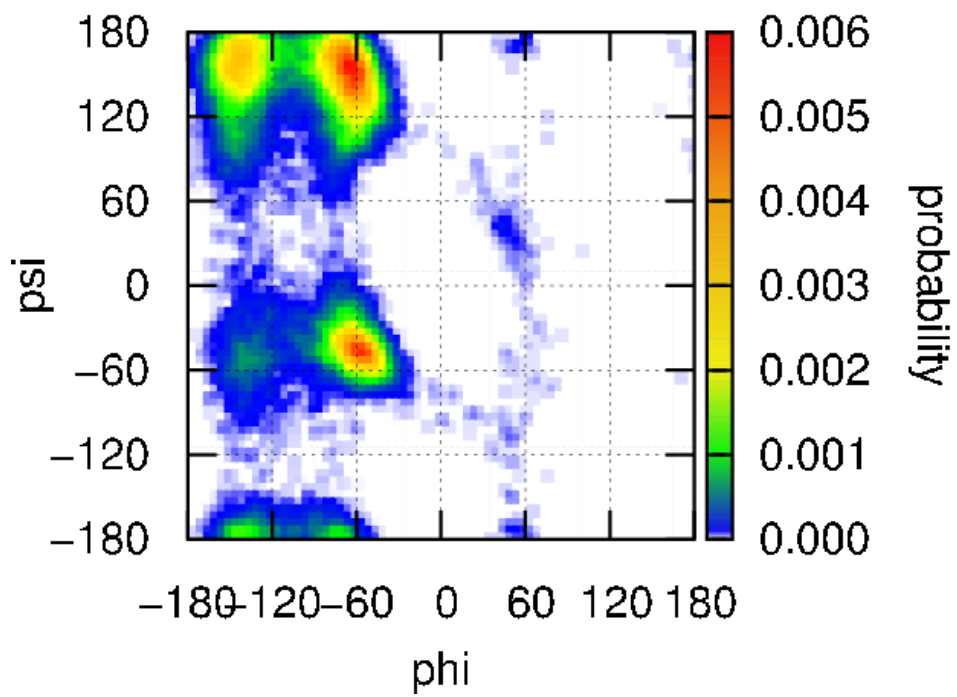

## 25 ALA

unacetylated

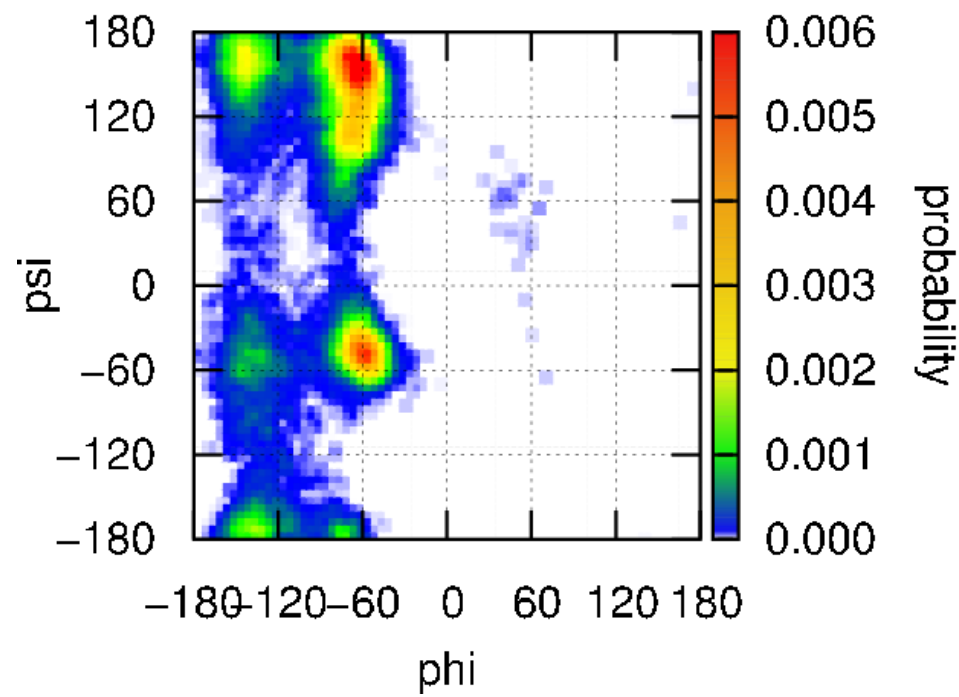

K14ac

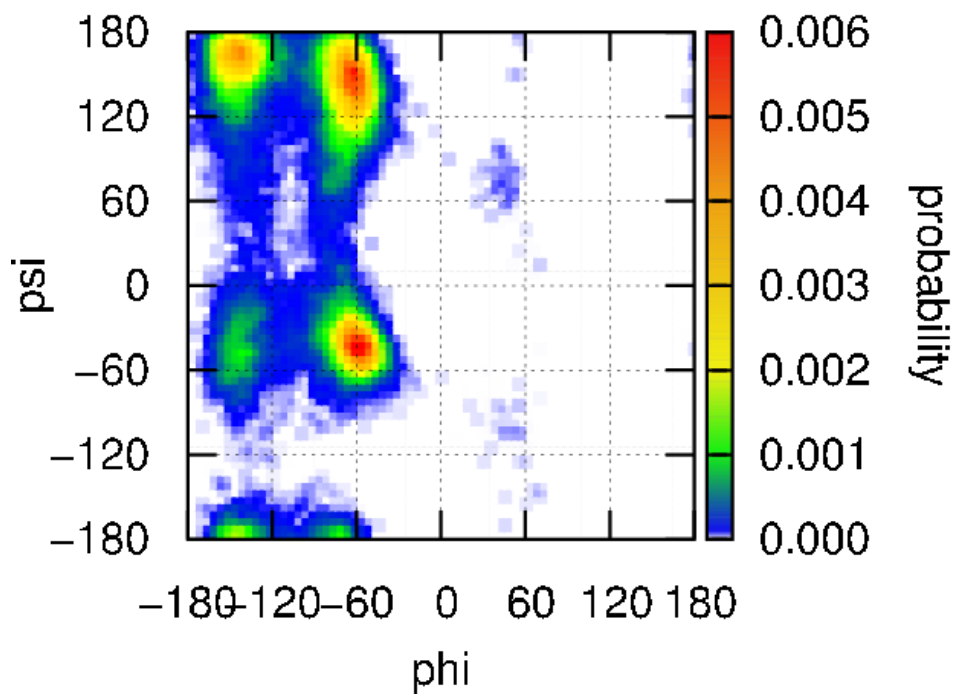

**26 ARG+**

**unacetylated**

**K14ac**

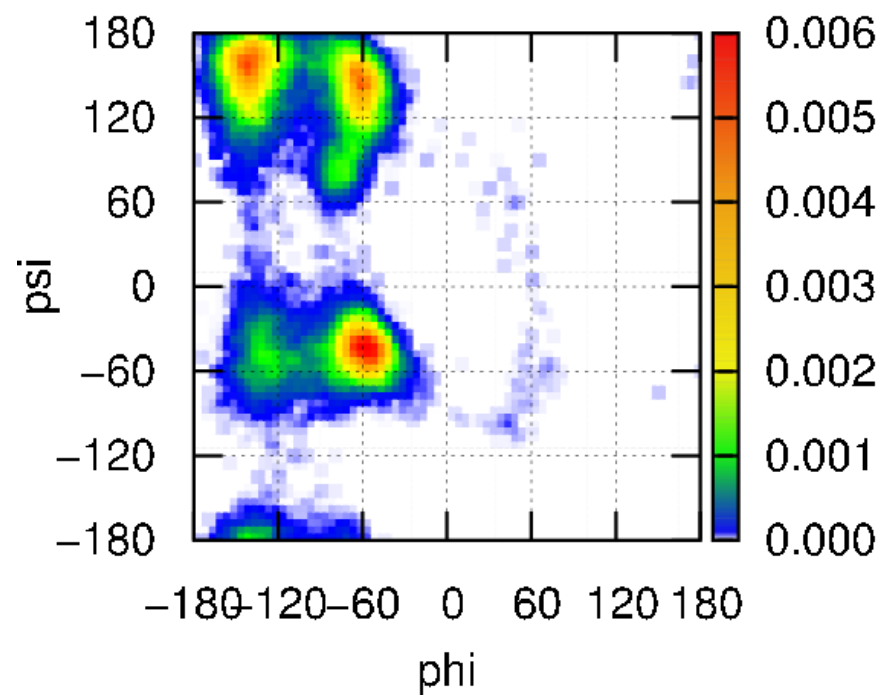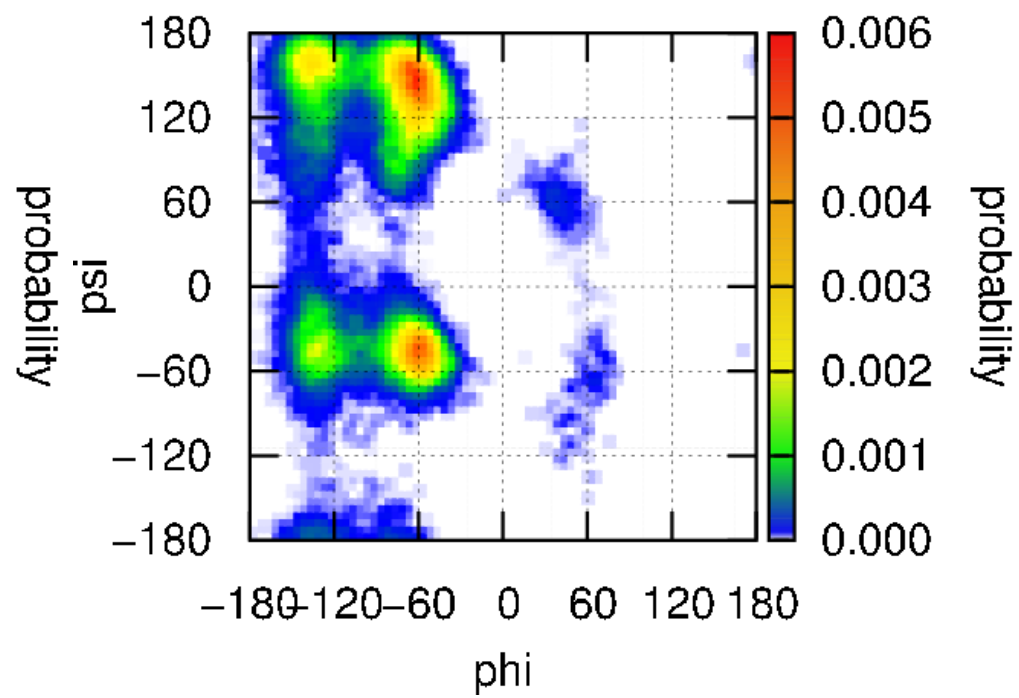

27 LYS+

unacetylated

K14ac

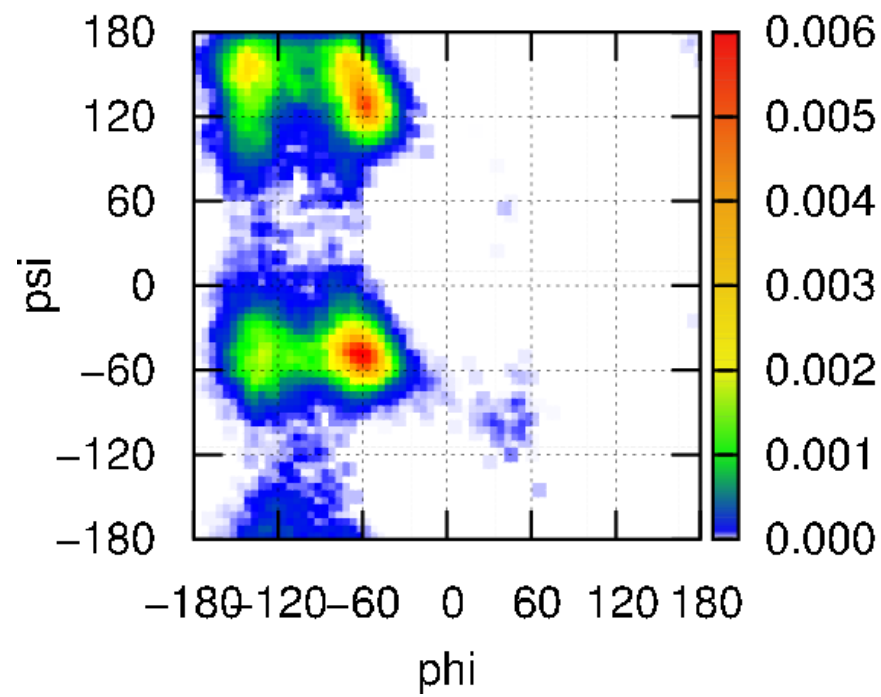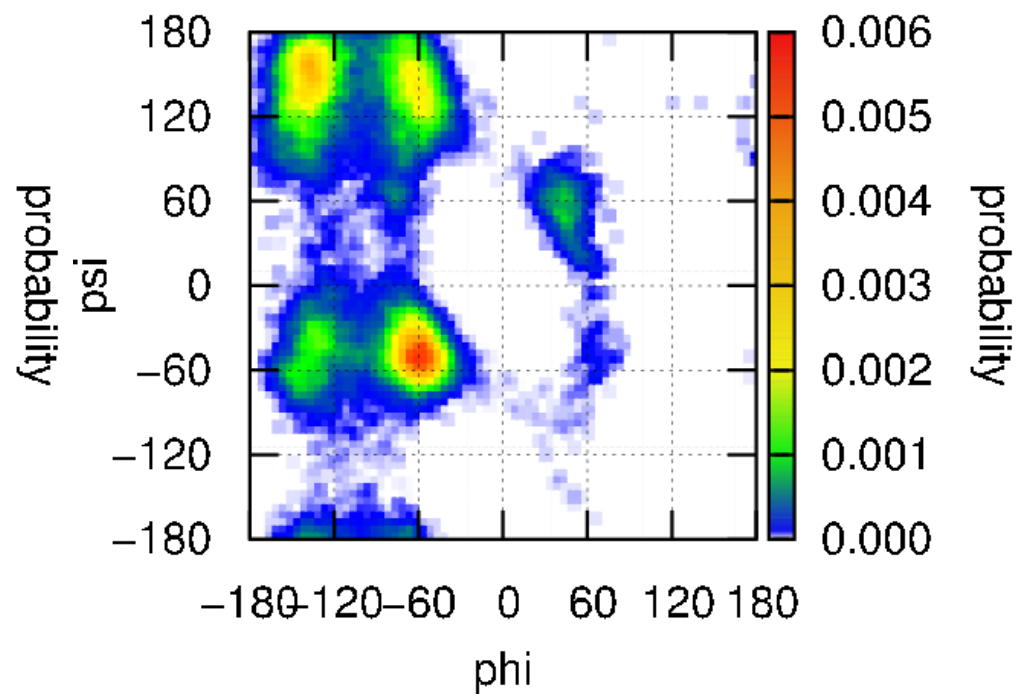

## 28 SER

unacetylated

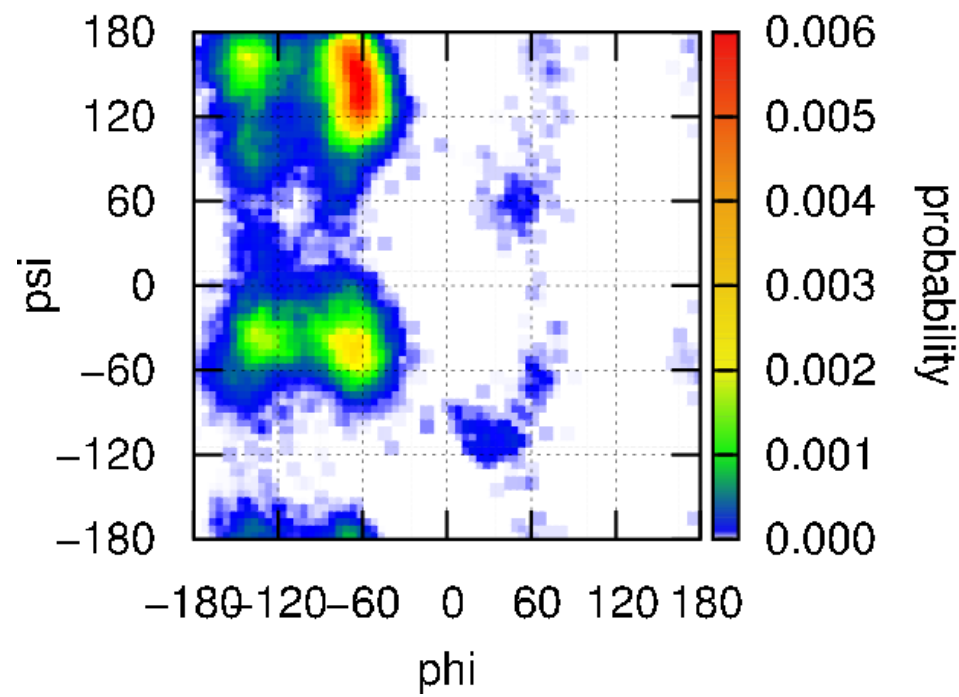

K14ac

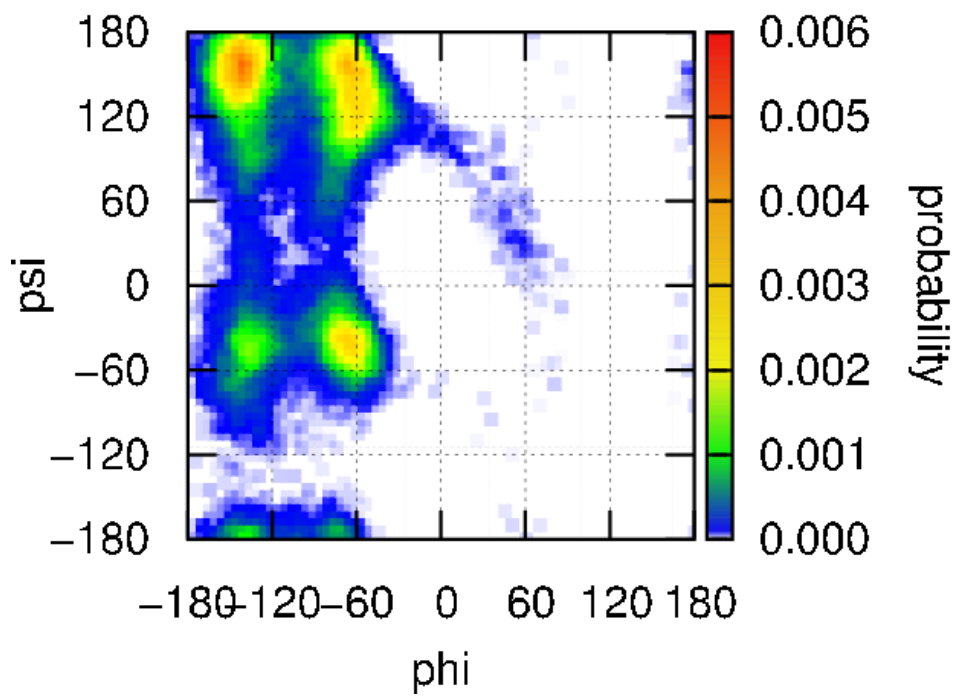

## 29 ALA

unacetylated

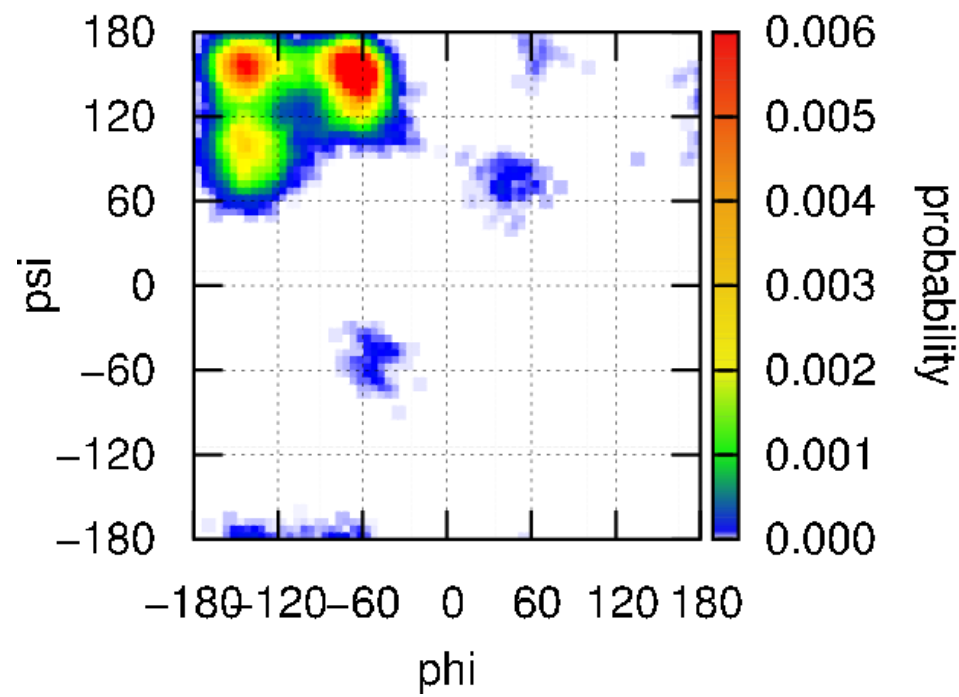

K14ac

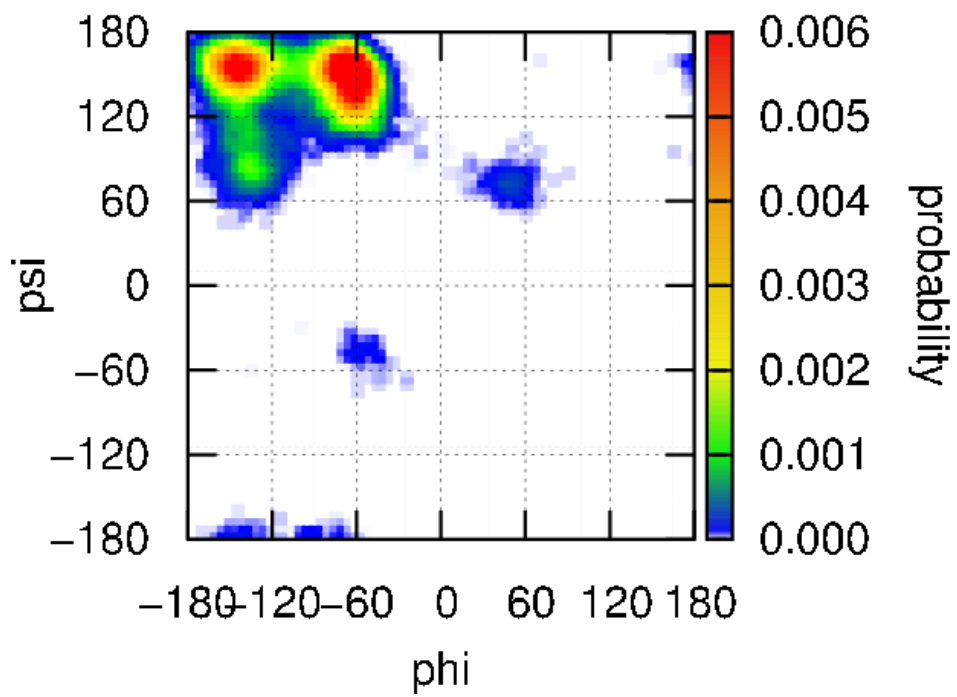

## 30 PRO

unacetylated

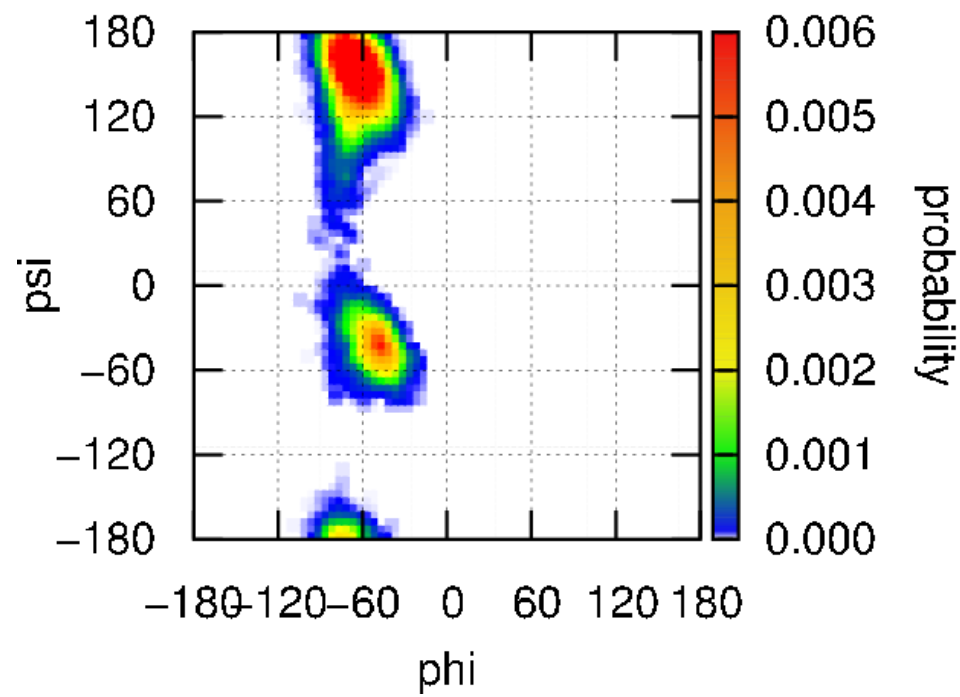

K14ac

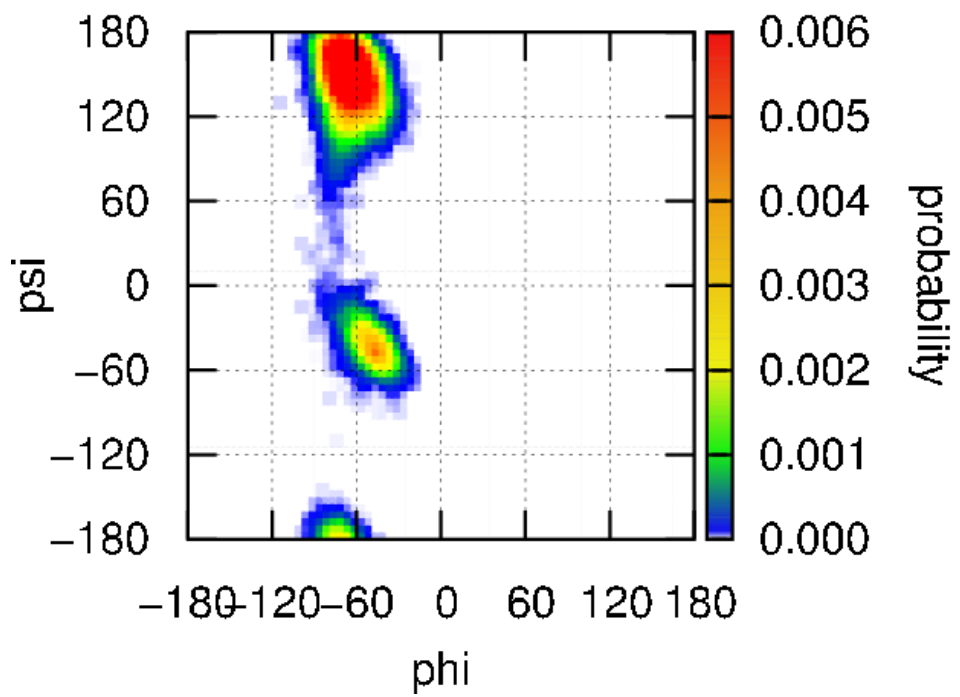

## 31 ALA

unacetylated

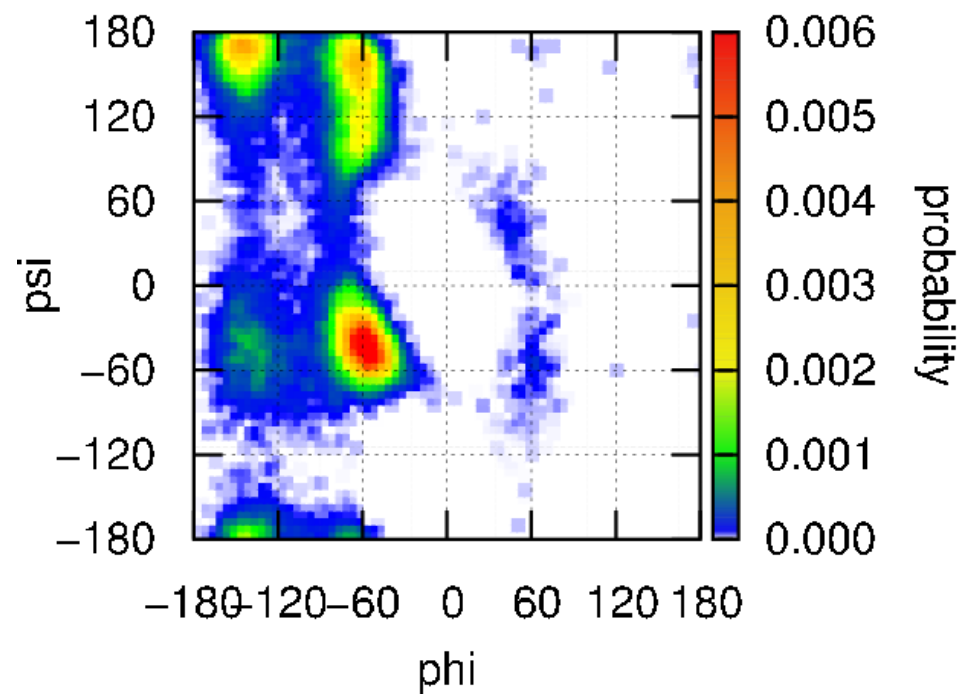

K14ac

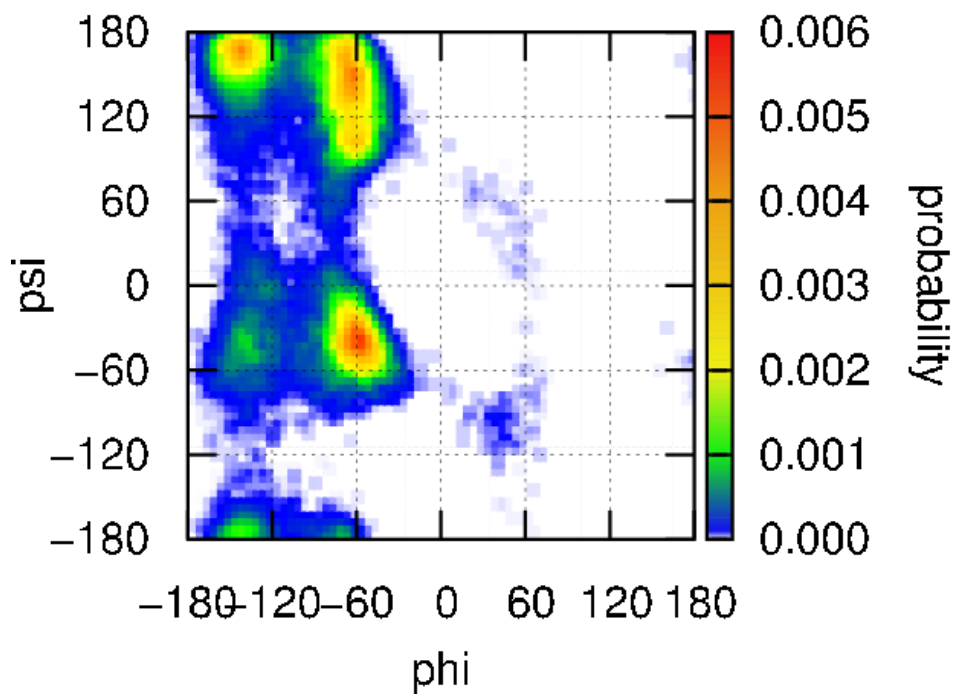

32 THR

unacetylated

K14ac

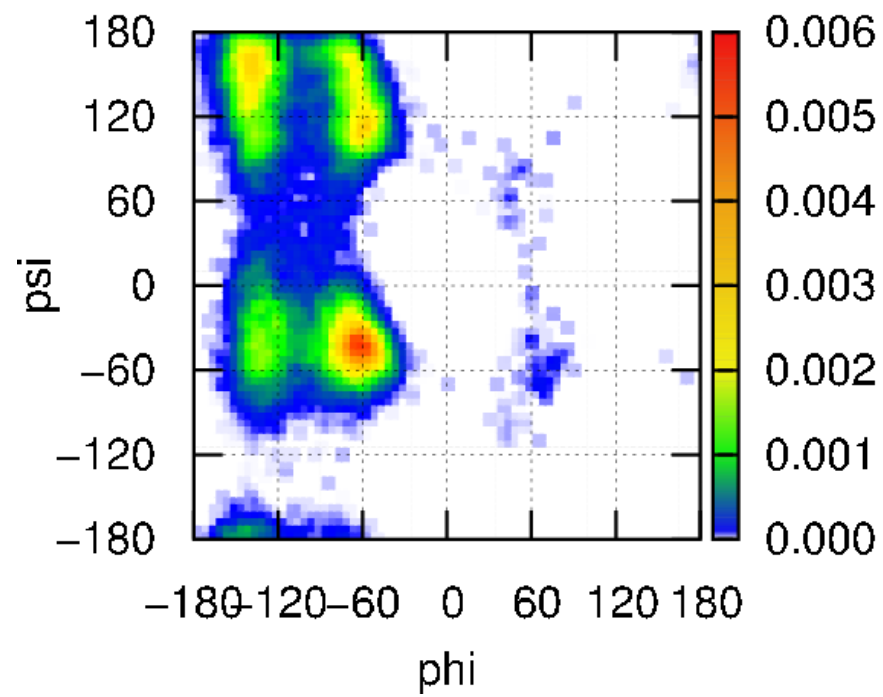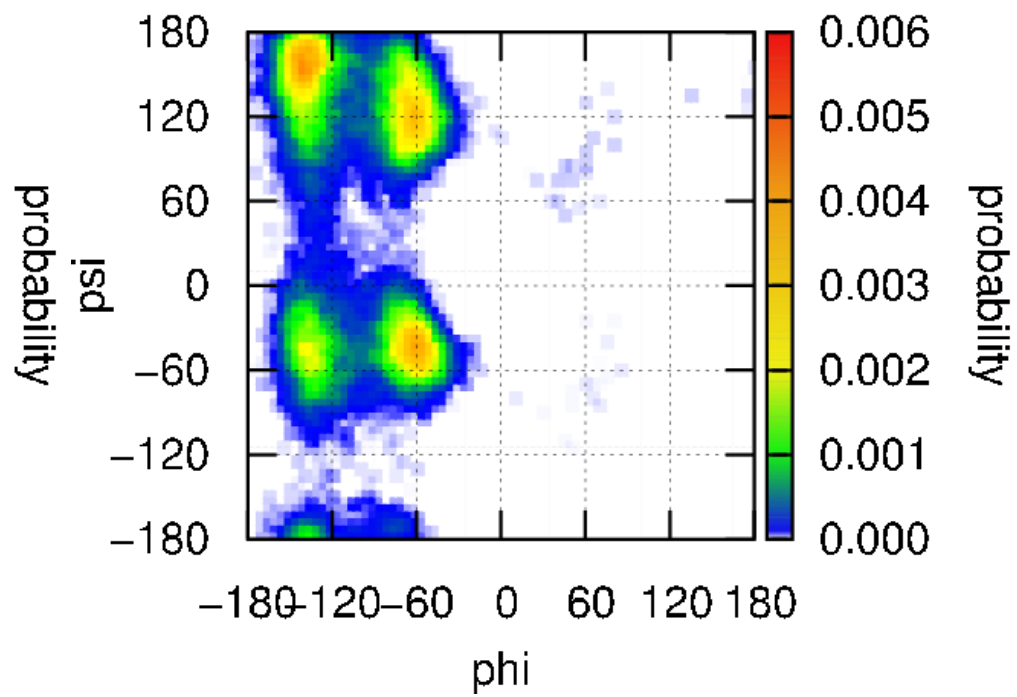

**33 GLY**

**unacetylated**

**K14ac**

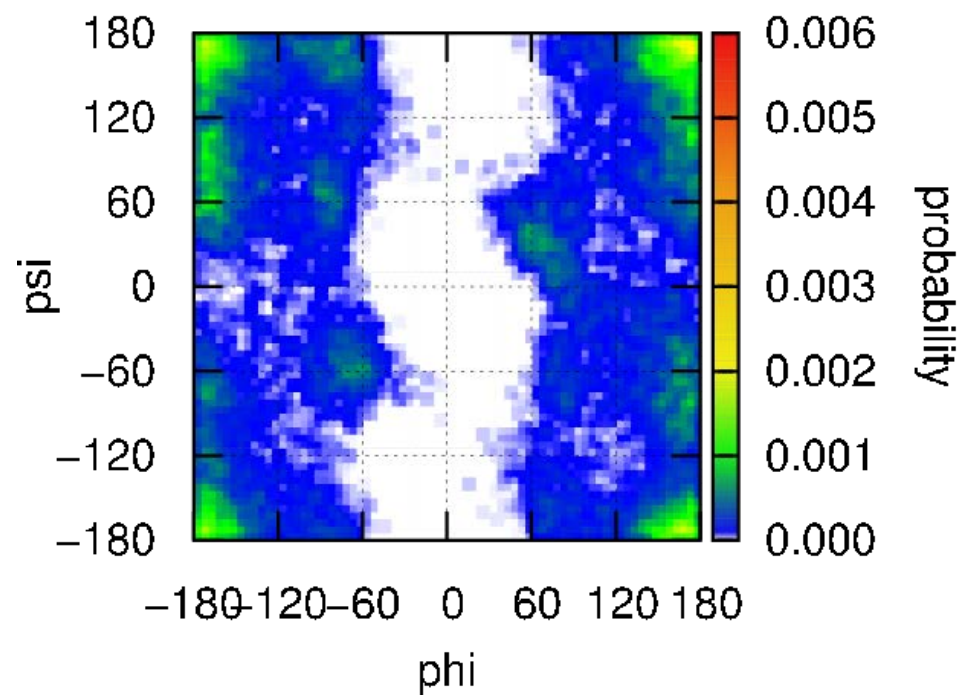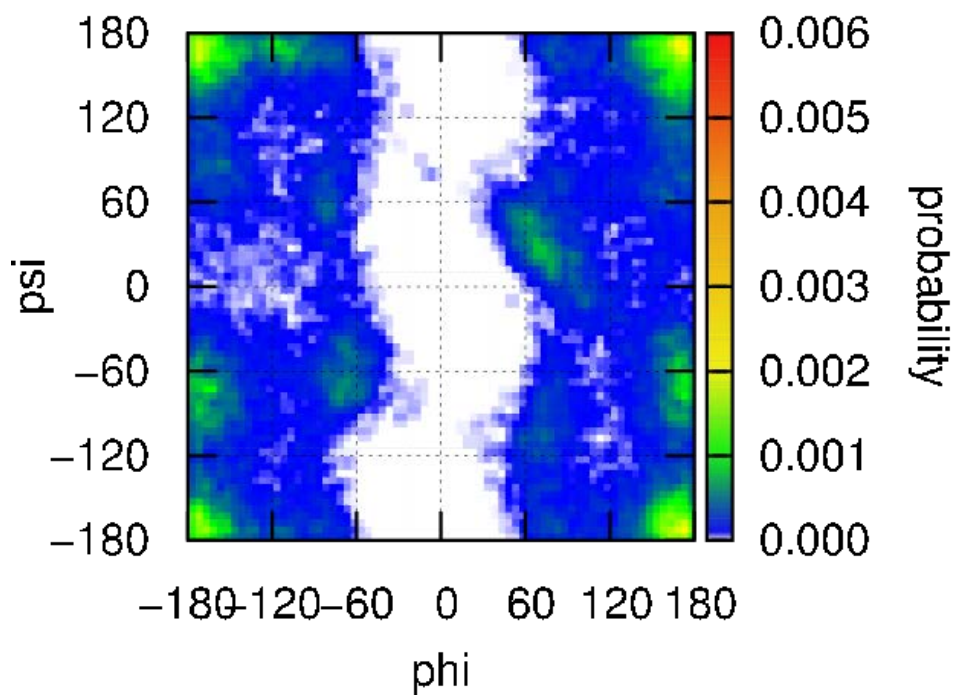

**34 GLY**

**unacetylated**

**K14ac**

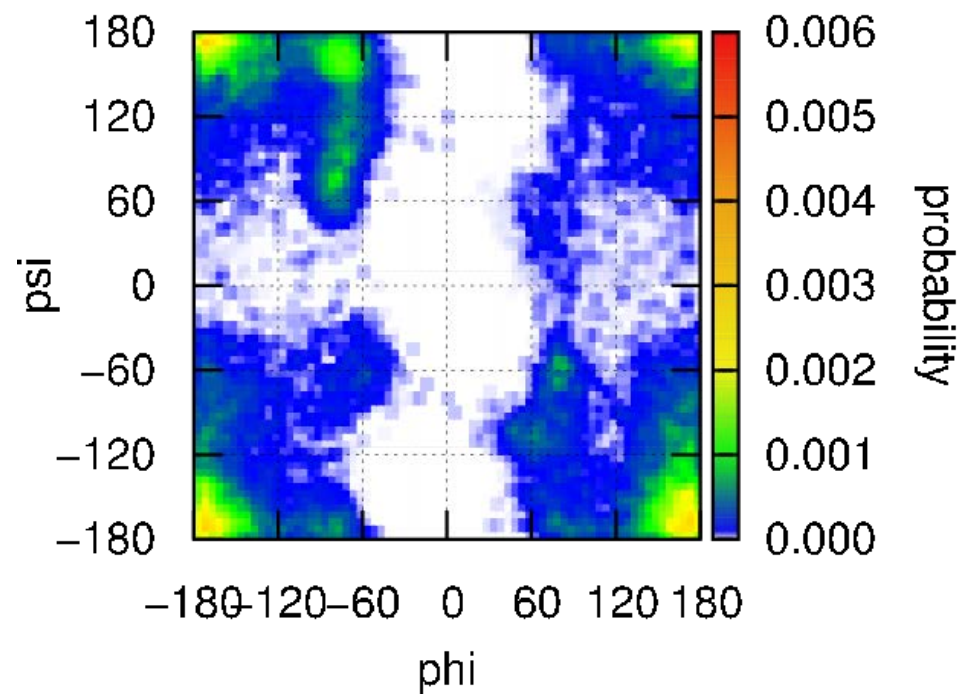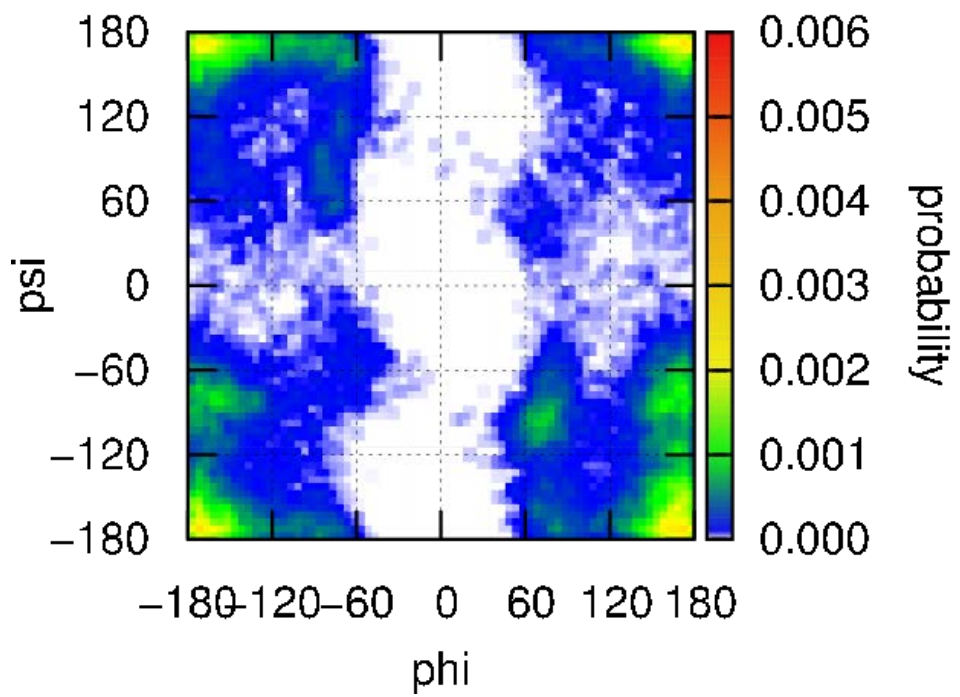

35 VAL

unacetylated

K14ac

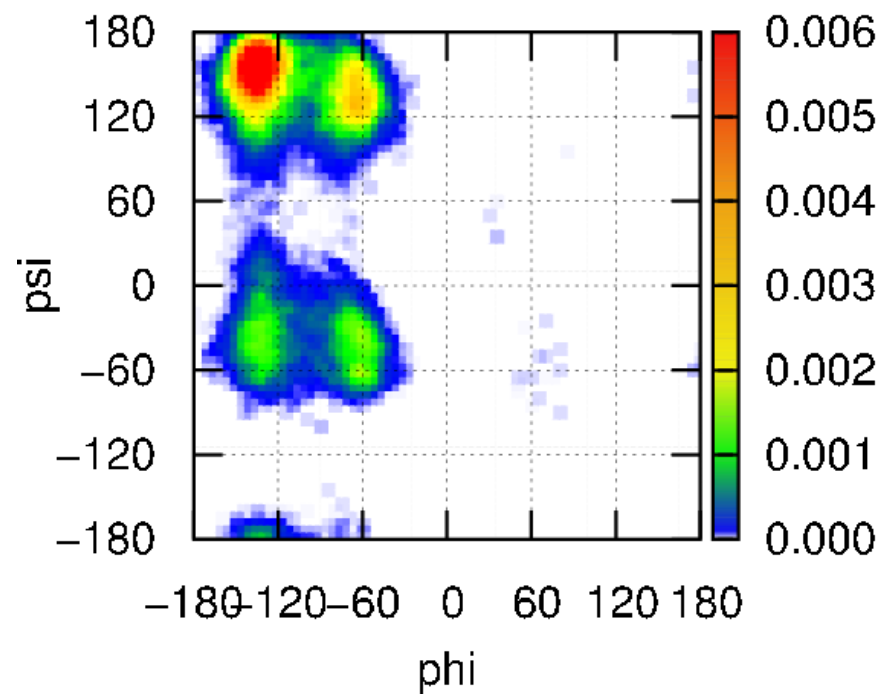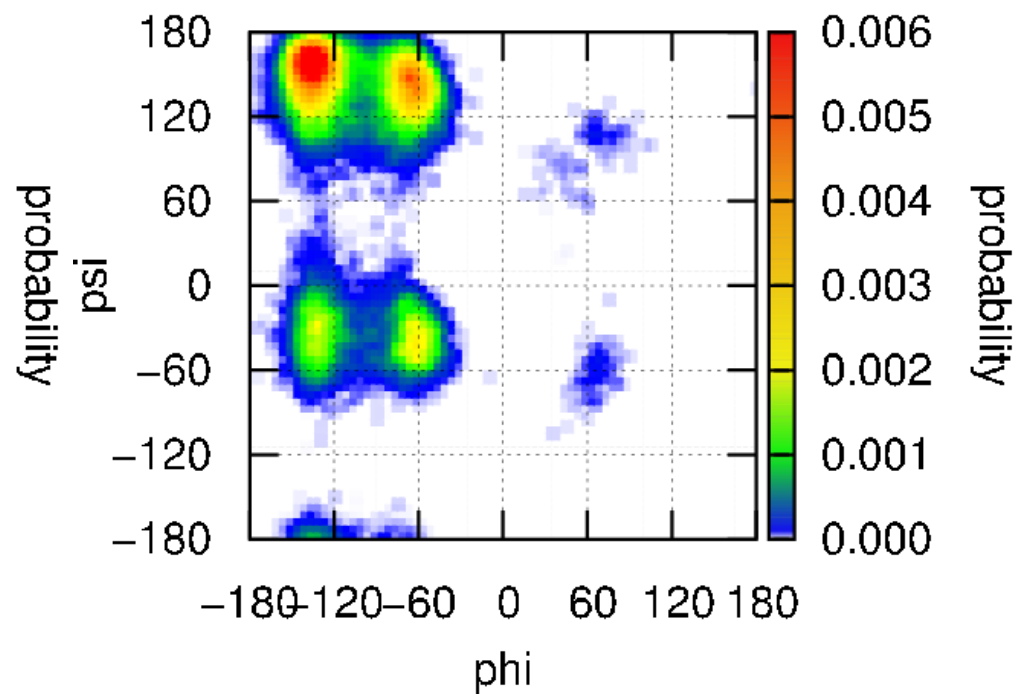

36 LYS+

unacetylated

K14ac

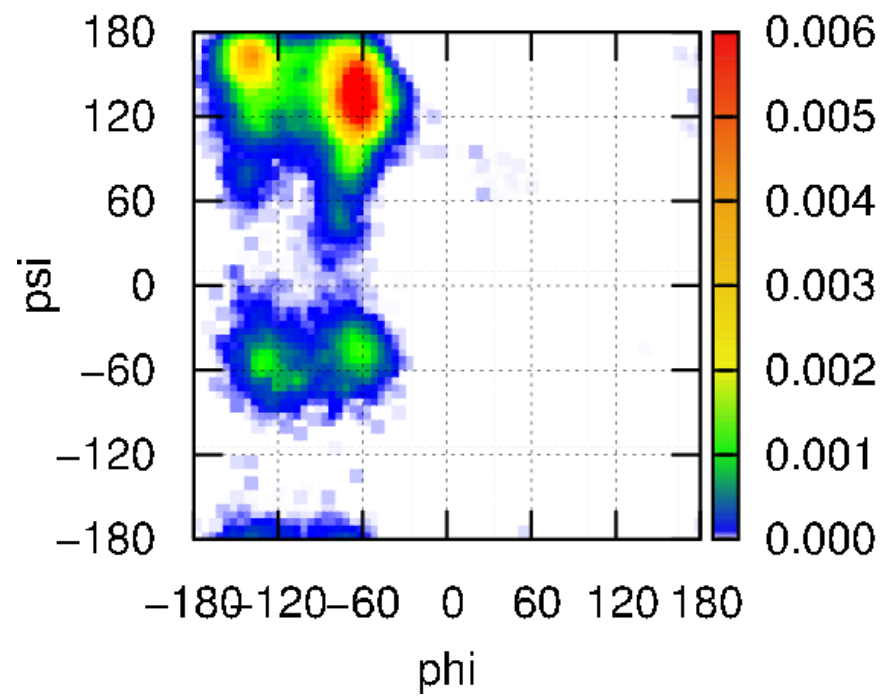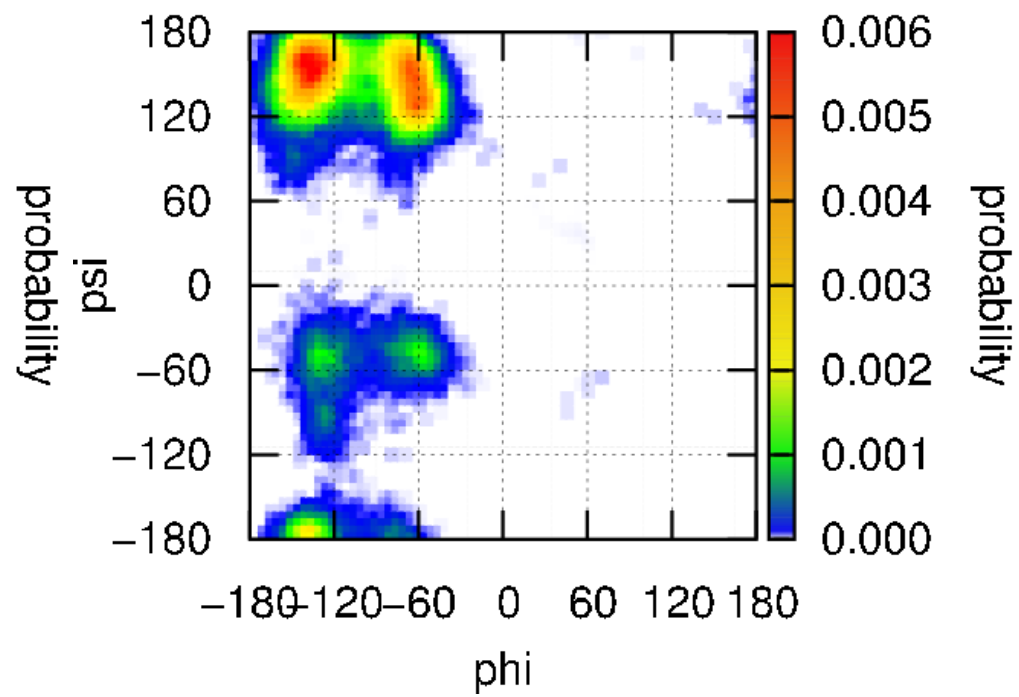

37 LYS+

unacetylated

K14ac

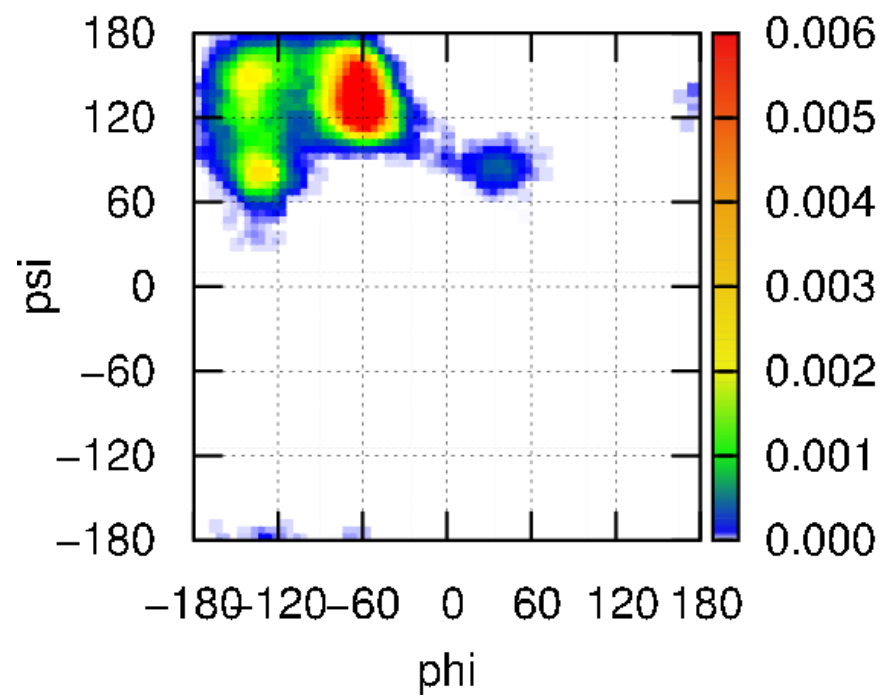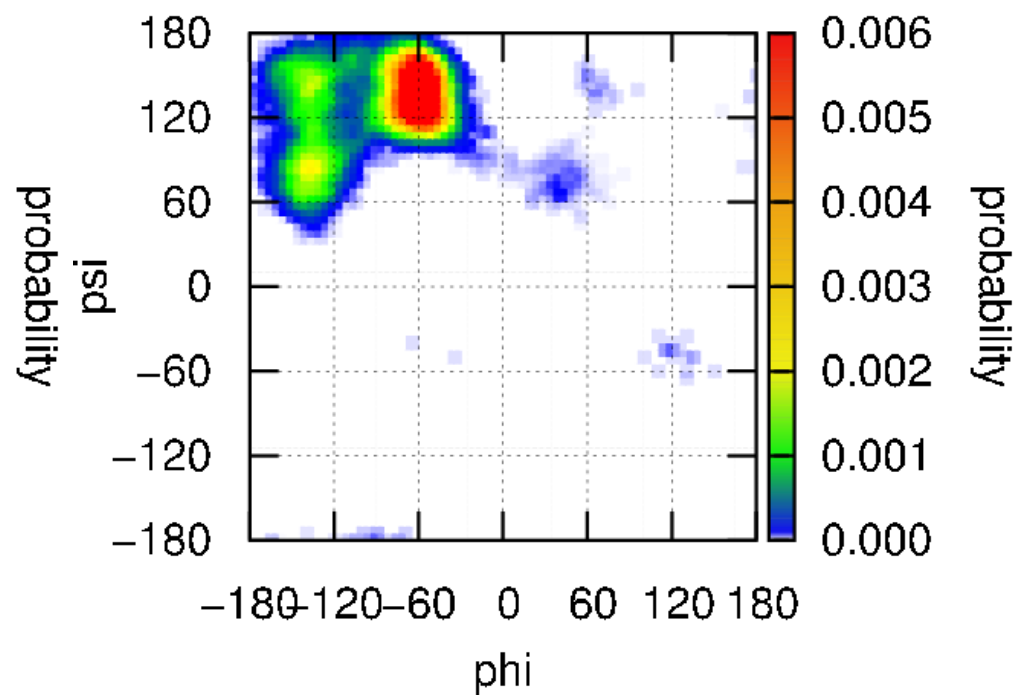

## 38 PRO

unacetylated

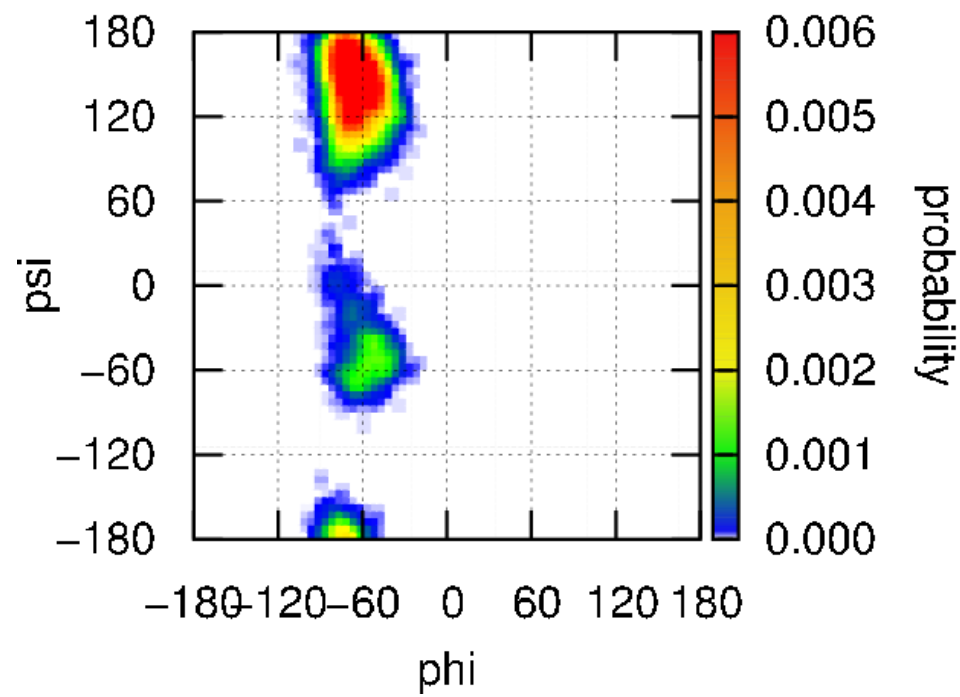

K14ac

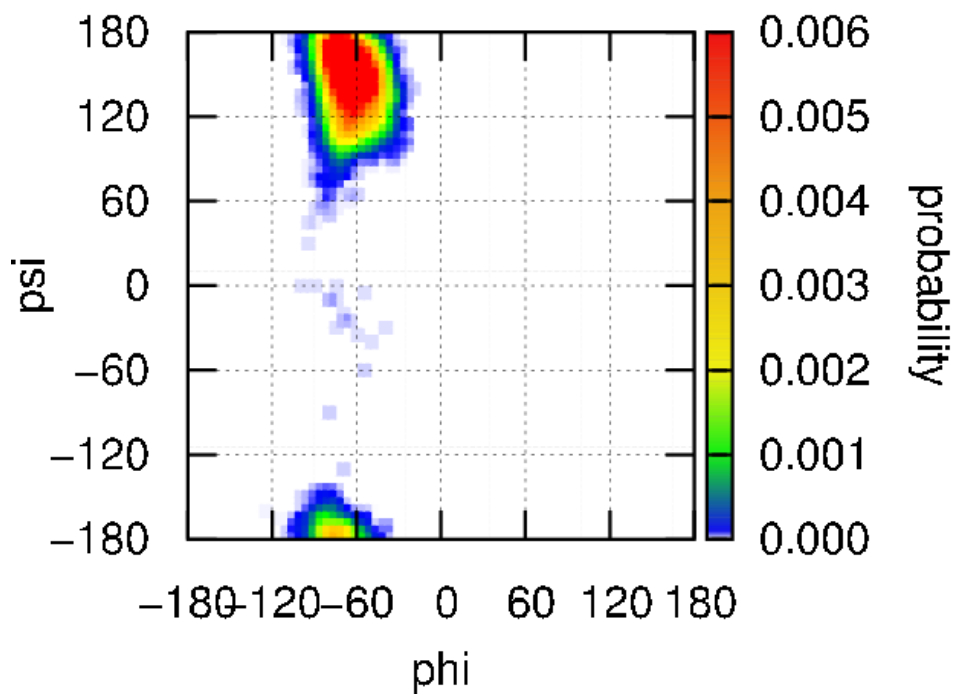

39 HIS

unacetylated

K14ac

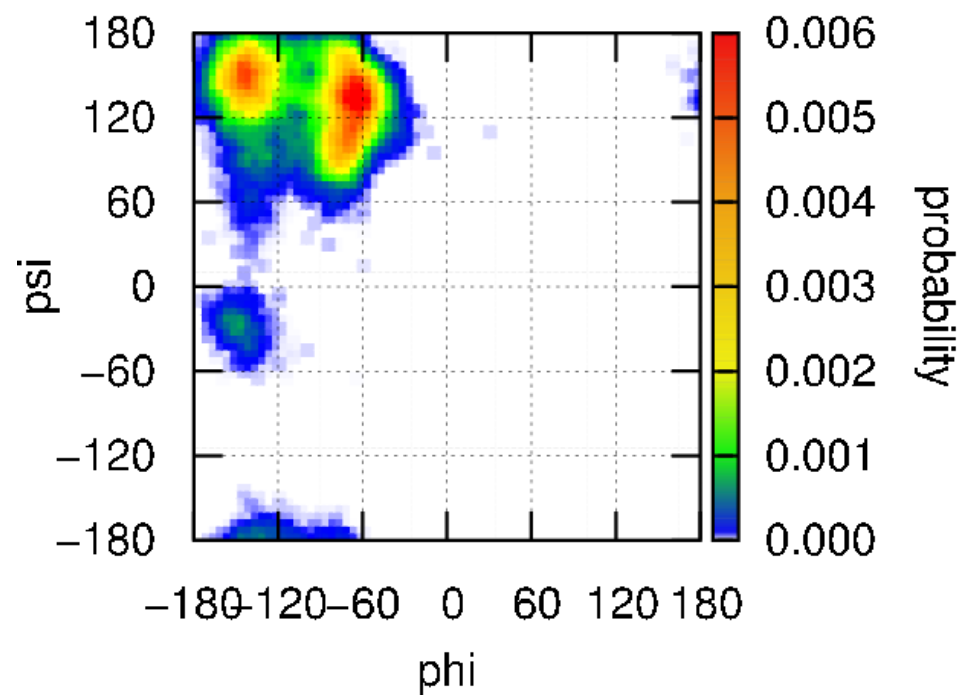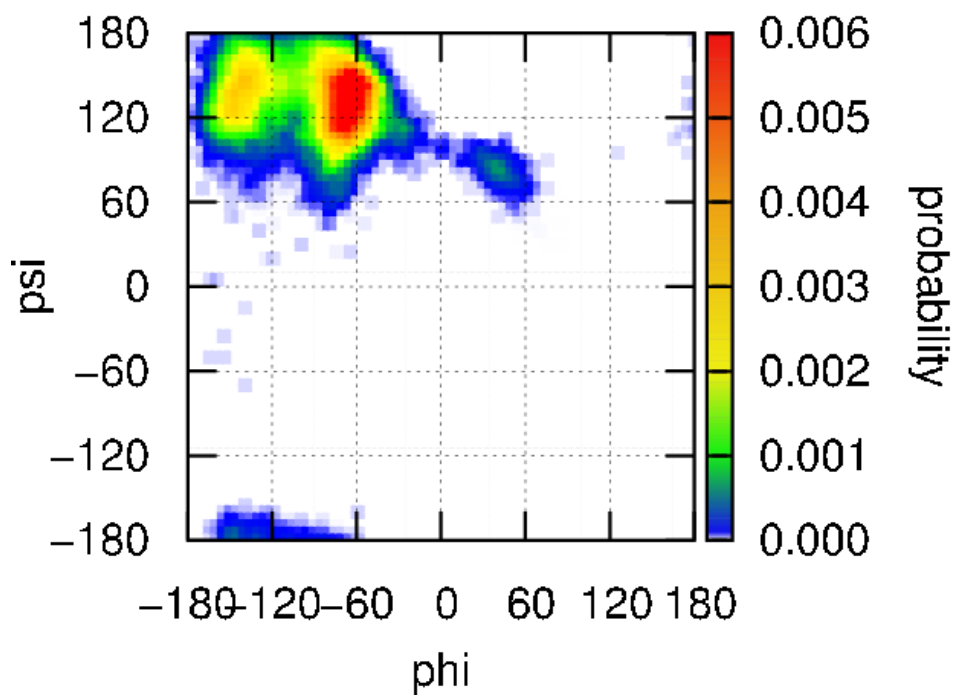

40 ARG+

unacetylated

K14ac

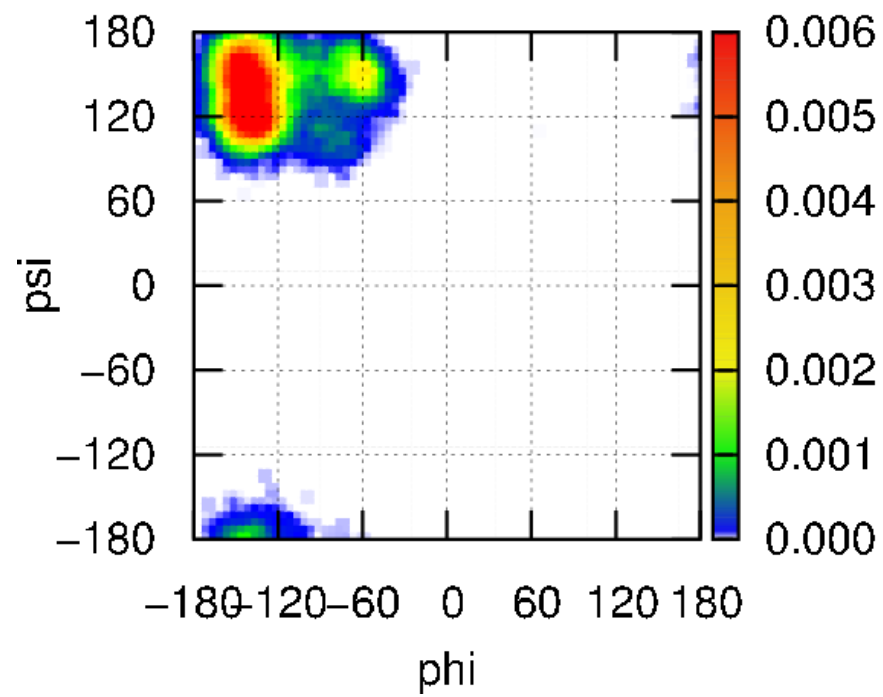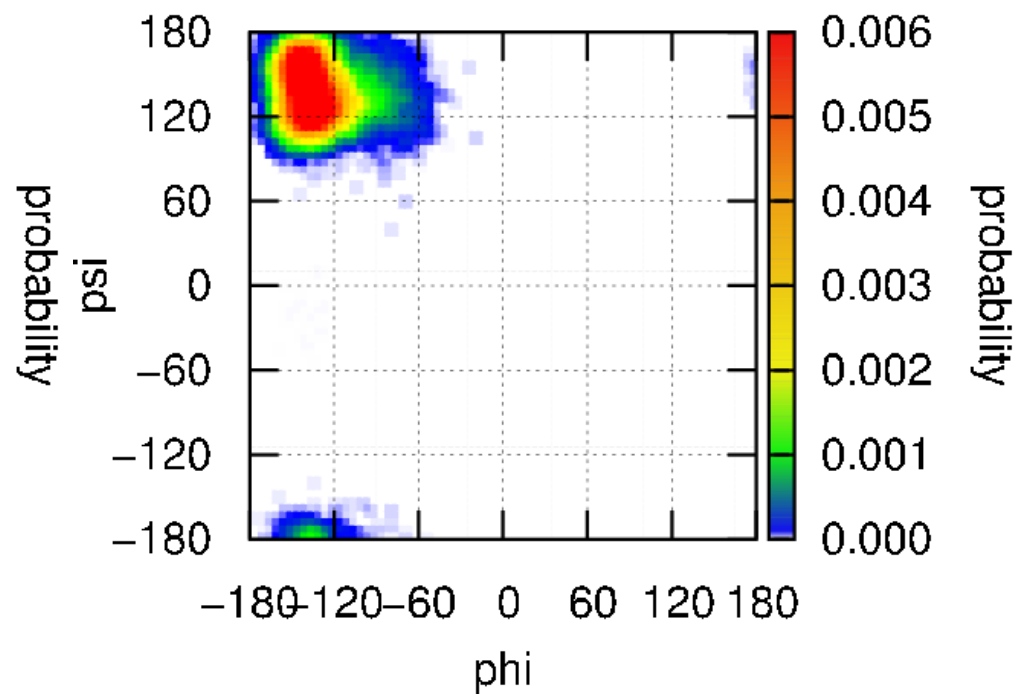

Supplement: S7 Fig — (PDF) [file pcbi.1004788.s007.pdf]
